# Supplementary material for: Global carbon uptake of cement carbonation accounts 1930–2021
Source: Copernicus journal article supplement (doi:10.5194/essd-2023-203), 2023-07-04
Supplement: Supplementary file [file essd-2023-203-AC3-supplement.zip]

# 1      **Global carbon uptake of cement carbonation accounts 1930-2021**

2      Zi Huang<sup>1,3\*</sup>, Jiaoyue Wang<sup>2,8,9,\*</sup>, Longfei Bing<sup>2,8,9,\*</sup>, Yijiao Qiu<sup>1</sup>, Rui Guo<sup>1</sup>, Ying  
3      Yu<sup>4</sup>, Mingjing Ma<sup>2</sup>, Le Niu<sup>2</sup>, Dan Tong<sup>1</sup>, Robbie M. Andrew<sup>5</sup>, Pierre Friedlingstein<sup>6</sup>,  
4      Josep G. Canadell<sup>7</sup>, Fengming Xi<sup>2,8,9</sup>, Zhu Liu<sup>1</sup>

5      <sup>1</sup>Department of Earth System Science, Tsinghua University, Beijing 100084, China

6      <sup>2</sup>Institute of Applied Ecology, Chinese Academy of Sciences, Shenyang 110016,  
7      China

8      <sup>3</sup>Department of Engineering Science, University of Oxford, Oxford, OX1 3PJ, UK

9      <sup>4</sup>Department of Environmental Sciences and Engineering, University of North  
10      Carolina at Chapel Hill, Chapel Hill 27599, United States

11      <sup>5</sup>CICERO Center for International Climate Research, Oslo 0349, Norway

12      <sup>6</sup>Department of mathematic and statistics, University of Exeter, Exeter, EX4 4QF, UK

13      <sup>7</sup> CSIRO Environment, Canberra, ACT 2601, Australia

14      <sup>8</sup> Key Laboratory of Pollution Ecology and Environmental Engineering, Chinese  
15      Academy of Sciences, Shenyang 110016, China

16      <sup>9</sup>Key Laboratory of Terrestrial Ecosystem Carbon Neutrality, Liaoning Province,  
17      China

18      \*These authors contributed equally to this work.

19      Correspondence:    Fengming    Xi    ([xifengming@iae.ac.cn](mailto:xifengming@iae.ac.cn))    and    Zhu    Liu  
20      ([zhuliu@tsinghua.edu.cn](mailto:zhuliu@tsinghua.edu.cn))

## 21      **Abstract:**

22      The main contributor to the GHG footprint of the cement industry is the  
23      decomposition of alkaline carbonates during clinker production. However, systematic  
24      accounts for the reverse of this process - namely carbonation of calcium oxide and other  
25      alkaline oxides/hydroxides within cement materials during cements' life cycle have  
26      only recently been undertaken. Here, adopting a comprehensive analytical model, we

provide the most updated estimates of CO<sub>2</sub> uptake by cement carbonation. The accumulated amount of global CO<sub>2</sub> uptake by cements produced from 1930 to 2021 is estimated to be 22.9 Gt CO<sub>2</sub> (95% Confidence interval, CI: 19.6-26.6 Gt CO<sub>2</sub>). This amount includes the CO<sub>2</sub> uptake by concrete, mortar, and construction waste and kiln dust, accounting for 30.1%, 58.5%, 4.0% and 7.1% respectively. The cumulative carbon uptake by cement materials from 1930 to 2021 offsets 55.1% of the emissions from cement production (41.6 Gt CO<sub>2</sub>, 95% CI: 38.7-47.2 Gt CO<sub>2</sub>) over the same period, with the greater part coming from mortar (58.5% of the total uptake). China has the highest cement carbon uptake, with cumulative carbonation of 7.06 Gt CO<sub>2</sub> (95% CI: 5.22-9.44 Gt CO<sub>2</sub>) since 1930. In addition, the carbon uptake amounts of USA, EU, India and rest of the world took 5.0%, 23.2%, 5.6% and 34.8% separately. As a result of rapidly increased production in recent year, over three-quarters of the cement carbon uptake has occurred since 1990. Additionally, our results show little impact of the COVID-19 pandemic on cement production and use, with carbon uptake reaching about 0.92 Gt CO<sub>2</sub> (95% CI: 0.78-1.10 Gt CO<sub>2</sub>) in 2020 and 0.96 Gt CO<sub>2</sub> (95% CI: 0.81-1.15 Gt CO<sub>2</sub>) in 2021. Our uniformly formatted and most updated cement uptake inventories provide coherent data support for including cement carbon uptake into future carbon budgets from the local to global scale. The latest version contains the uptake data till 2021, showing the global uptake increasing pattern and offering more usable and relevant data for evaluating cement's carbon uptake capacity. All the data described in this study are accessible at <https://doi.org/10.5281/zenodo.7516373> (Bing et al., 2023).

## 1 Introduction

With continued urbanization in the developing world and infrastructure projects worldwide, cement consumption has increased rapidly (Low, 2005). The cement production process is an energy-intensive and CO<sub>2</sub>-emitting process, the total CO<sub>2</sub> emission of which amounts to 5–8 % of global CO<sub>2</sub> emissions (IEA, 2019; Xuan et al., 2019; Friedlingstein et al. 2022). The worldwide average CO<sub>2</sub> emission coefficient of

ordinary Portland cement (OPC) is 0.86 kgCO<sub>2</sub>/kg (Damtoft et al., 2008), which comprises the release of 0.53 kgCO<sub>2</sub> /kg of clinker owing to the decomposition of limestone during calcination. While in use, though, cement materials that are exposed to air naturally undergo carbonation (Pade and Guimaraes, 2007; Renforth et al., 2011; Huntzinger et al., 2009), a physicochemical process where atmospheric CO<sub>2</sub> gradually absorbs into concrete's structure and reacts with alkaline components such as CaO in a moist environment. The main carbonation mechanisms that are responsible for the carbon uptake can be attributed to the oxides, hydroxide and silicate constituents, as described by Reactions (R1) and (R2).

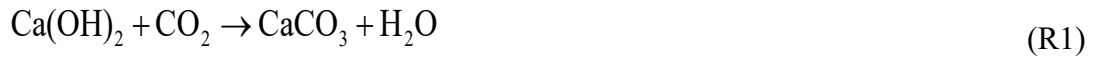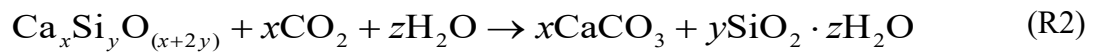

Unfortunately, from the perspective of offsetting emissions in the production of cement, carbonation is a slow process that occurs over the entire life-cycle of cementitious materials, in contrast to the instantaneous CO<sub>2</sub> emissions during their production (Andersson et al., 2013). It has been shown that up to a quarter of the CO<sub>2</sub> emitted in cement production can be reabsorbed throughout a building's life and recovery phase (Xi et al., 2016). Quite a few procedures for evaluating the CO<sub>2</sub> footprint over cement's lifecycle have been suggested (Damineli et al., 2010; Renforth et al., 2011; Yang et al., 2013; Cao et al., 2020). Most procedures, however, consider only a case limited system boundary and material type such as concrete service stage, recycling phase of concrete after demolition (Andersson et al., 2013; Yang et al., 2014; Xi et al., 2016; Cao et al., 2020; Kaliyavaradhan et al., 2020), and do not take other types and stages of the lifecycle into systematic account. In our previous study (Guo et al., 2021), which incorporated the merits from other work (Andersson et al., 2013; Yang et al., 2014; Xi et al., 2016; Cao et al., 2020; Kaliyavaradhan et al., 2020) and the updated clinker ratio and/or cement production data, we constructed a comprehensive analytical model to estimate the time-series of cement CO<sub>2</sub> uptake inventories and

estimated that 21.02 Gt CO<sub>2</sub> had been sequestered in cements produced between 1930 and 2019, which abated 55% of the corresponding process emission over the same period.

The cement CO<sub>2</sub> uptake and emission dataset can be accounted annually. In this study, based on the previous data frameworks (Guo et al., 2021), we updated cement production and emission factors, and most up-to-date clinker ratio data of the year of 2020 and 2021. Adopting previous comprehensive analytical model (Guo et al., 2021), we updated the cement CO<sub>2</sub> uptake and emission dataset from 1930 to 2021. The inventories are constructed in a uniform format, which includes cement process-related emissions and cement uptake from four material types with three life stages burned in five countries or regions. The uniformly formatted time-series cement uptake inventories can be utilized widely. Using this consistent framework and models, we provide an updated annual cement carbon uptake to be used in the annual assessments of the global carbon budget (GCB) (Friedlingstein et al., 2022). These timely updated inventories can provide robust data support for further analysis of global or regional emissions reduction policy-making, especially for carbon-intensive industry like cement manufacturing industry. By accelerating carbon capture from existing cement materials and using waste concrete as a carbon storage material, cement could reduce its net carbon emission impact. The primary focus of this research is to update the cement carbon uptake data up to 2021 using a methodology consistent with our previous publication. By doing so, we aim to provide the most current and up-to-date data to accurately portray the impact of cement carbon uptake. The data can be downloaded freely from <https://doi.org/10.5281/zenodo.7516373>.

## **2 Data and Methods**

The cement CO<sub>2</sub> uptake and process emission in this dataset were estimated in terms of the comprehensive analytical model and based on IPCC administrative territorial-based accounting scope. In addition, we also assessed the uncertainties in cement uptake and process emission estimates using the Monte Carlo method that IPCC

recommended. The detail input data are in SI-Table 1 (available from: <https://doi.org/10.5281/zenodo.7516373>). Our inventories were constructed in two parts: process-related (cement) CO<sub>2</sub> emissions and cement material uptake. Figure 1 presents a diagram of the entire construction of our cement material carbonation uptake and cement emission inventories.

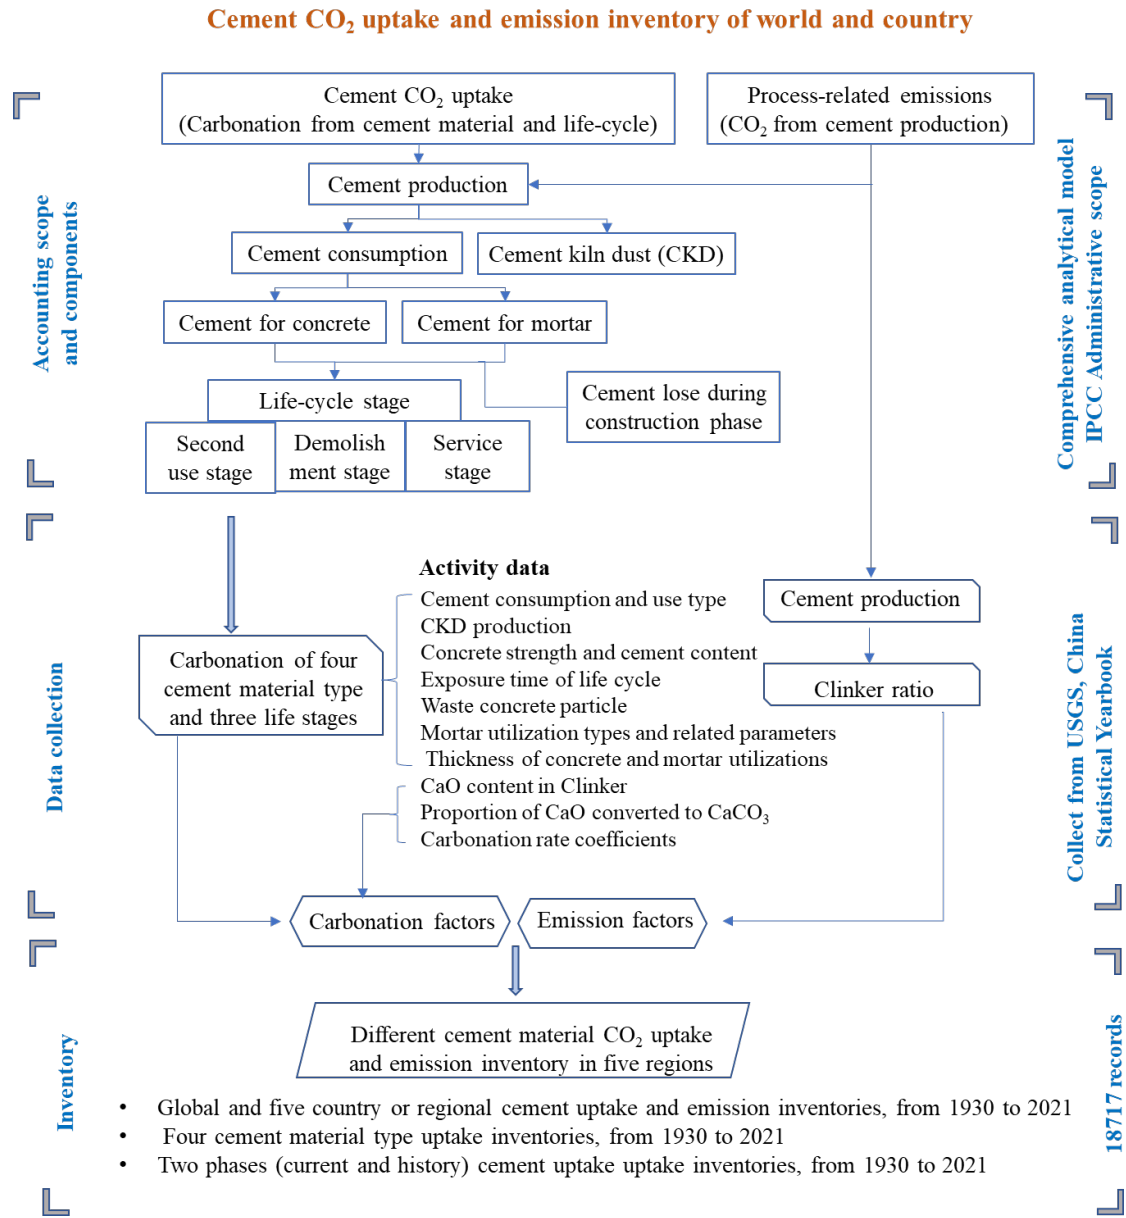

Figure 1. Diagram of cement CO<sub>2</sub> uptake and emission inventory construction.

## 2.1 Cement production data sources

To keep the consistency with the previous study (Xi et al., 2016; Guo et al., 2021), we still obtained the global cement production data from 1930 to 2021 from the United

States Geological Survey (USGS) and geographically divided into five primary countries and aggregated regions, including China, the United States (US), Europe and central Eurasia (including Russia), India and the rest of the world (ROW). In this study, we updated cement production for year 2020 and 2021, and the global cement production was collected from USGS cement statistics and information annual report (USGS, 2022), regional cement productions were gained from China Statistical Yearbook (NBS, 2022), USGS cement annual publication (USGS, 2022), Trading Economics (2019) for China, US, Europe and Central Eurasia (including Russia) and India, respectively. The clinker ratio data was kept the same with the previous data sources (CCA et al., 2001-2005; Xu et al., 2012; Xu et al., 2014; Cao et al., 2017; MIIT, 2019) except the US which was collected from USGS annual cement report (USGS, 2022).

## 2.2 Cement process emission calculation

In producing cement clinker, the major constituent of cement (OPC), limestone together with other carbonates are decomposed into their corresponding oxides and gaseous CO<sub>2</sub> via calcination, resulting in the process emission of the cement industry. It is a so-called hard-to-abate CO<sub>2</sub> emission source (Antunes et al., 2021) because no clear avenue has yet been found to replace this chemical process. Therefore, the process emission intensity (factor) is related to the composition of the clinker and its content in the cements in question. The IPCC recommended default value of process emission factor is 0.507 kg CO<sub>2</sub> kg<sup>-1</sup> clinker (EFDB, 2002), without the emissions associated with MgCO<sub>3</sub>. In our work, the value of clinker ratio for China was taken to be 0.51966 kg CO<sub>2</sub> kg<sup>-1</sup> clinker for dry with preheater without pre-calciner, dry with preheater and pre-calciner, and dry without preheater (long dry) kilns, and 0.49983 kg CO<sub>2</sub> kg<sup>-1</sup> clinker for semi-wet or semi-dry and wet or shaft kilns since 2005, as adapted from Shen's study (Shen et al., 2016). For other countries, Andrew's recent work (Andrew, 2019) established a sound foundation for those who are in absence of survey data (data can be accessed from SI-Table 1 – SI data 3 from

<https://doi.org/10.5281/zenodo.7516373> ). Besides, the survey data was obtained from the World Business Council for Sustainable Development (WBCSD) and the Global Cement Directory 2019 (publicly named as the GCD-2019 dataset). Finally, the use of integrated global plant-level capacity and technology information was maintained and continued in this study for higher accuracy in contrast to regionally averaged cement emission factors (Guo et al., 2021).

In general, the process emission can be calculated by Equation 1:

$$E_{process,i} = P_{cement,i} \times f_{clinker,i} \times EF_{CO_2,i} \quad (1)$$

Where  $E_{process,i}$  is the cement process emission of the different regions.  $P_{cement,i}$  is the regional cement production. The  $f_{clinker,i}$  and  $EF_{CO_2,i}$  are clinker to cement ratios and cement (clinker) carbon emission factors of these five regions respectively.

### 2.3 Cement life-cycle uptake assessments

The cement utilization was categorized by four types: concrete, mortar, cement kiln dust and cementitious construction wastes, which included three life stages (Xi et al., 2016; Guo et al., 2021) named: (1) service, (2) demolition, and (3) second use. Thus, the whole carbon uptake process can be designed as

$$C_{uptake} = C_{concrete} + C_{mortar} + C_{wastes} + C_{CKD} \quad (2)$$

$$C_{concrete} = C_{l,tl} + C_{d,td} + C_{s,ts} \quad (3)$$

$$C_{mortar} = C_{l,tl} + C_{d,td} + C_{s,ts} \quad (4)$$

Where  $C_{uptake}$ ,  $C_{concrete}$ ,  $C_{mortar}$ , and  $C_{waste}$  are the uptake amounts of every types.  $C_{l,tl}$ ,  $C_{d,td}$ , and  $C_{s,ts}$  are the uptake amounts during service, demolition and secondary-use stages, respectively. Following our previous study, 100 years were considered to be the total life-cycle time. During service stage, cement materials are mainly used for civil infrastructures' constructions. Based on Fick's second law, a simplified model was applied in this work which introduced a two-dimensional diffusion "slab" process shown in Fig. 2. Fick's second law determines the relationship of carbonization depths and reaction time( $t_l$ ) linked by diffusion coefficient ( $k$ ), which can be described as:

$$d = k\sqrt{t} \quad (5)$$

168 Then, based on the reaction of cement carbonation and IPCC's report, the carbonation  
169 calculation can be expressed to be

$$C = f_{cement}^{clinker} \times f_{clinker}^{CaO} \times \gamma \times \frac{M_{CO_2}}{M_{CaO}} \quad (6)$$

170 Where the  $f_{cement}^{clinker}$  is clinker ratio,  $f_{clinker}^{CaO}$  is the CaO content in the clinker, and  
171  $\gamma$  is the fraction of CaO that could be converted to  $CaCO_3$ .  $M_{CO_2}$  is molar mass of  
172  $CO_2$ .  $M_{CaO}$  is molar mass of CaO.

173 In order to simplify the calculation model, some assumptions were applied in this  
174 study. Firstly, the diffusion front was assumed regarded to be the same as the  
175 carbonation front with the area behind the front was fully carbonated; and then, in the  
176 slab model shown as Fig. 2, the carbonation amounts is determined as a function of  
177 exposed surface area, carbonation depth and the cement content of concrete. Due to the  
178 influence on the carbonation process of exposure condition and materials properties, in  
179 this study, for concrete, a compressive-strength-class breakdown was carried out based  
180 on the regional standards. For mortar, the different kinds of utilization – rendering,  
181 masonry and maintenance were considered most important. Two main exposure  
182 conditions (buried and in open air) were considered, with different carbonation  
183 coefficients. Specifically, carbon sequestration of these four types of cementitious  
184 materials was in the Supplement document.



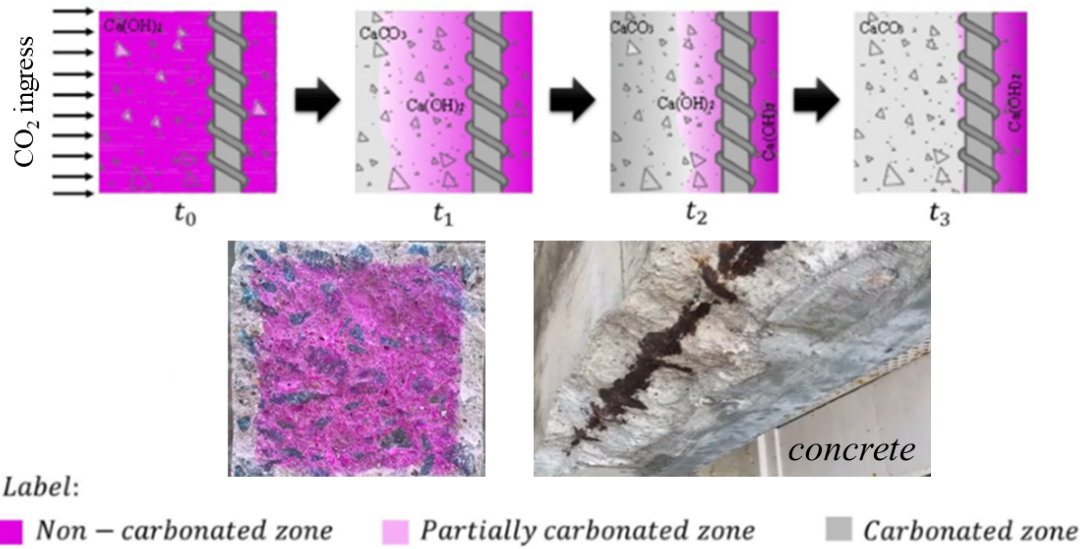

Fig 2. A schematic representation of carbonation model of concretes.

## 2.4 Uncertainty assessment

Based on the kinetic models described in previous sections, in this study, the uncertainty estimations through Monte Carlo simulation are applied in cement process emission and cement carbon uptake separately. The term “uncertainty” in this study refers to the lower and upper bounds of a 95 % confidence interval (CI) around our central estimate, i.e. median. All of the input parameters of activity levels and emission and uptake factors, with corresponding statistical distributions, were fed into a Monte Carlo framework, and 10 000 simulations were performed to analyse the uncertainties in estimated carbon emissions and uptake. The uncertainty ranges of cement process emission and carbon uptake are in SI-Table 4 (Bing et al., 2023). The previous works (Xi et al., 2016) have illustrated the sources of uncertainties. Coherently to previous studies (Xi et al., 2016; Guo et al., 2021), the annual global cement carbon uptake and emission was obtained from regional or material use aggregation, which include 26 variables and factors, shown as SI-Table 2 (Bing et al., 2023). Notably, the annual median at a higher level is not equal to the sum of its sublevel components when evaluate the carbon uptake at each level due to the different statistics based on the Monte Carlo simulation results (see <https://doi.org/10.5281/zenodo.7516373>; Bing et al., 2023; Guo et al., 2021). In this work for our model used for 2020 and 2021, most

of the distributions and their features of variables remain and refer to the previous estimation (Guo et al., 2021). But, the clinker to cement ratio of US is updated based on USGS cement annual report of 2021, leading to a change that the random errors are within the range of  $\pm 5\%$  (a uniform distribution). Specially, the clinker ratio was set to range from 75 % to 97 % in a Weibull distribution with shape and scale parameters of 91.0 % and 25 for regional aggregation of the years of 1930–2021. For China and India, the clinker ratio distribution was unchanged for 1930–1989. For China, the range of coefficient values of the clinker ratio was set to 10%–20% for 1990–2004 with a Normal distribution; for 2004–2021, the random errors were calculated within the range of  $\pm 5\%$  of the mean values with a uniform distribution. For India, the random errors were calculated within the range of  $\pm 10\%$  for 1990–2001 and  $\pm 5\%$  for 2002–2021 of the mean values with a uniform distribution.

Meanwhile, to discern the relative contributions of distinct parameters to the uncertainty inherent in model predictions, a One-at-a-time (OAT) sensitivity analysis was executed. The OAT methodology involves altering one parameter while maintaining others constant, thereby isolating and gauging the impact of that particular parameter on the projected outcomes. By comparing the relative influence of various parameters, those that wield a more pronounced effect on model predictions become evident. Within the purview of the OAT analysis conducted here, each parameter was perturbed by +10% to discern the variables imparting considerable uncertainty to forecasted cement carbon uptake.

### **3 Results and discussions**

#### **3.1 Global and regional CO<sub>2</sub> emissions from cement process**

Although, carbon reduction policies have become more stringent and technologies more effective since 2019 and accompanied by uncertainties factors that the Covid-19 occurred, global CO<sub>2</sub> emissions from cement processes have been increasing rapidly over the recent past decades due to the continuous growth in the production of cement and related clinker as well, but showing a slightly lower average annual growth rate of

2019 (8.57%) than that of recent past decades (8.68%). According to our calculations and estimates, the global cement process CO<sub>2</sub> emissions have increased from 0.03 Gt yr<sup>-1</sup> in 1930 to 1.81 Gt yr<sup>-1</sup> in 2021. Over the period 1930-2021, global cumulative cement process CO<sub>2</sub> emissions amounted to 41.55Gt (95% CI: 38.74-47.19 Gt CO<sub>2</sub>) Specifically, around 67% was accumulated from 1930 to 1990, little fewer than that from 1930 to 2019 (71%). This illustrates that the rapid increase in cement process emissions is mainly driven by industrialization and urbanization accompanied by the development of the global economy. From 1930 to 2021, global cement production increased over 6000%, while the growth rate of CO<sub>2</sub> emissions (5547.31%) was slightly lower than that of cement production, partly due to the relative decreases in average clinker ratios from ~89 % in 1930 to ~70 % in 2019. (Wang et al., 2021).

The regional contribution of CO<sub>2</sub> emissions from the cement process has been altered over the period 1930-2021. As shown in Fig. 3, the CO<sub>2</sub> emissions from the cement process in each region show an overall growth trend, while the growth rate varies by country and region. Among all regions, China experienced the most dramatic increasing emission trend with an annual growth rate of 7.7% and reached 0.76Gt CO<sub>2</sub> (95% CI:0.73-0.80Gt CO<sub>2</sub>) in 2021. China contributed 33.5% of cumulative process emissions (13.91Gt CO<sub>2</sub>, 95% CI:12.44-17.00 Gt CO<sub>2</sub>) during the period 1930-2021. Meanwhile, ROW (mainly developing countries/regions), Europe, and the US were responsible for about 35.6% (14.78Gt CO<sub>2</sub>, 95% CI:13.17-17.87 Gt CO<sub>2</sub>), 23.98% (9.96 Gt CO<sub>2</sub>, 95% CI:8.71-12.46 Gt CO<sub>2</sub>), and 6.3% (2.62Gt CO<sub>2</sub>, 95% CI:2.29-3.27 Gt CO<sub>2</sub>) of total cumulative emissions, respectively. India has experienced an incremental growth trend in recent years, totally emitting 2.56 Gt CO<sub>2</sub> (95% CI:2.33-3.02 Gt CO<sub>2</sub>), accounting for around 6.2% of process emissions. China and ROW kept their absolute leader role in cement CO<sub>2</sub> emissions till 2021, but the share of India has decreased significantly from ~10% to 6.2% in recent 2 years, partly because of shrink of the cement market during Covid pandemic (Schlorke et al., 2020).

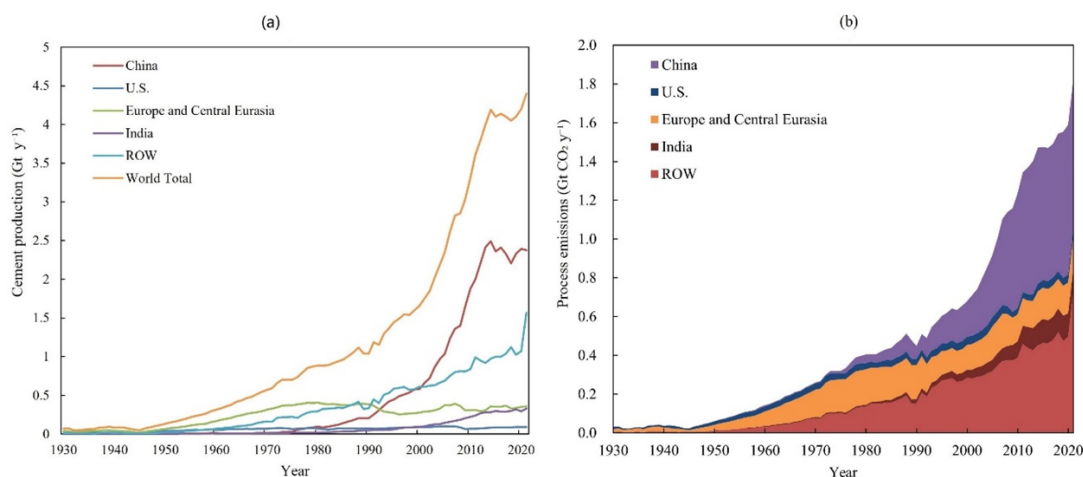

**Fig. 3** Regional and global cement production (a) and process emissions (b) from 1930 to 2021

### 3.2 Cement carbon uptake by region and material type

According to our estimates, the total global CO<sub>2</sub> uptake by cement reached 0.96 Gt CO<sub>2</sub> (95% CI: 0.81-1.15 Gt CO<sub>2</sub>) in 2021, with an average annual growth rate of 7.9%. This means that 30.8% of CO<sub>2</sub> emission from the cement process in 2021 was offset by cement carbon uptake in that year. It shows that the cement uptake increasing fast during around 2000-2013, then the increase rate slowed down due to the changes in cement production. with fast increase rate during ~2000-2013 then with slowed down increase rate is due to the changes in cement production Global cumulative CO<sub>2</sub> uptake by cement was estimated to be 22.90 Gt CO<sub>2</sub> (95% CI: 19.64-26.64 Gt CO<sub>2</sub>), equivalent to ~55% of the cumulative emissions over the same period. As we can see in Fig. 4, in China, cement carbon uptake has increased from 0.05 Mt in 1930 to 426.77 Mt in 2021; its cumulative uptake has reached 7.06 Gt CO<sub>2</sub> (95% CI: 5.22-9.44 Gt CO<sub>2</sub>), accounting for 30.8% of global cumulative uptake. The cement carbon uptake in China was growing exponentially, while the growth curves in the US and European countries were relatively smooth. This is mainly because the cement demand in China has observed a rapid growth in recent decades, while developed countries have been close to saturation after the 1980s. Moreover, concrete structures in developed countries have a longer service life (estimated 70 years). As for the rest of world, the total carbon uptake by

cement has also increased significantly (from 0.74 Mt in 1930 to 328.23 Mt in 2021), and the growth trend in these countries was smoother than in China but more dramatic than in the US and Europe.

In addition, the amount of cement carbon uptake varies depending on the type of cement material. Mortar contributes the largest portion of cement carbon uptake although its application scale is much less than concrete (~73% for concrete use and ~24% for mortar use). This is because mortar, as a building decoration material, has the characteristics of small thickness, large exposed surface area, and therefore fast carbonation kinetics. According to Fig.6, in 2021, the carbon uptake by mortar and concrete were 536.85 Mt and 325.95 Mt, accounting for 55.6% and 33.8% of the total cement carbon uptake, respectively. Meanwhile, CKD and loss waste absorbed 62.60 Mt (6.5%) and 34.97 Mt (3.6%) CO<sub>2</sub>, respectively.

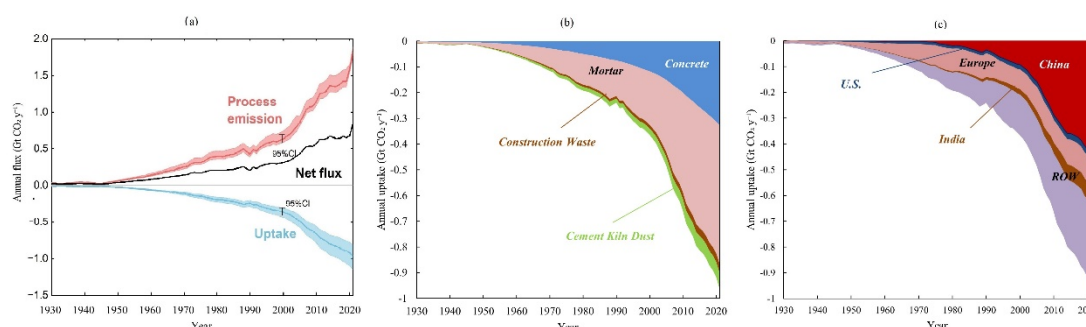

**Fig. 4** Annual cement carbon uptake induced net emission (a) and cement CO<sub>2</sub> uptake by different cement materials (b) and by different country or region (c) from 1930 to 2021

### 3.3 Features of cement carbon uptake

The cement uptake in certain year actually consists of two parts, namely the current uptake and historical uptake. The current uptake refers to the uptake from the year cement is produced, and have close relationship with the current cement production. Historical uptake refers to the uptake accumulated from year before. The natural carbonation of cement materials is a slowly dynamic process and thus the carbon uptake by cement has obvious time lag effects. As shown in Fig.7, part of carbon uptake in a

given period was contributed by cement materials in previous periods. This is because the cementitious materials carbon uptake is very slow process, leading to a long time to accumulate to manifest and during the demolition period of cement materials, crushing increases its newly exposed surface area and carbonation rate, allowing the carbon uptake capacity of cement materials to persist for a long time. With this feature, the cement carbon uptake capacity can be affected by the service life of cement buildings, and the average lifetime in China (40 years) is less than in the US and Europe (65~75 years). Therefore, countries such as China with a higher speed of cement carbonation cycle can make relatively greater contributions to cement carbon uptake. However, the majority of cement carbon uptake was still attributed to the consumption use stage, providing ~64% share in 2021.

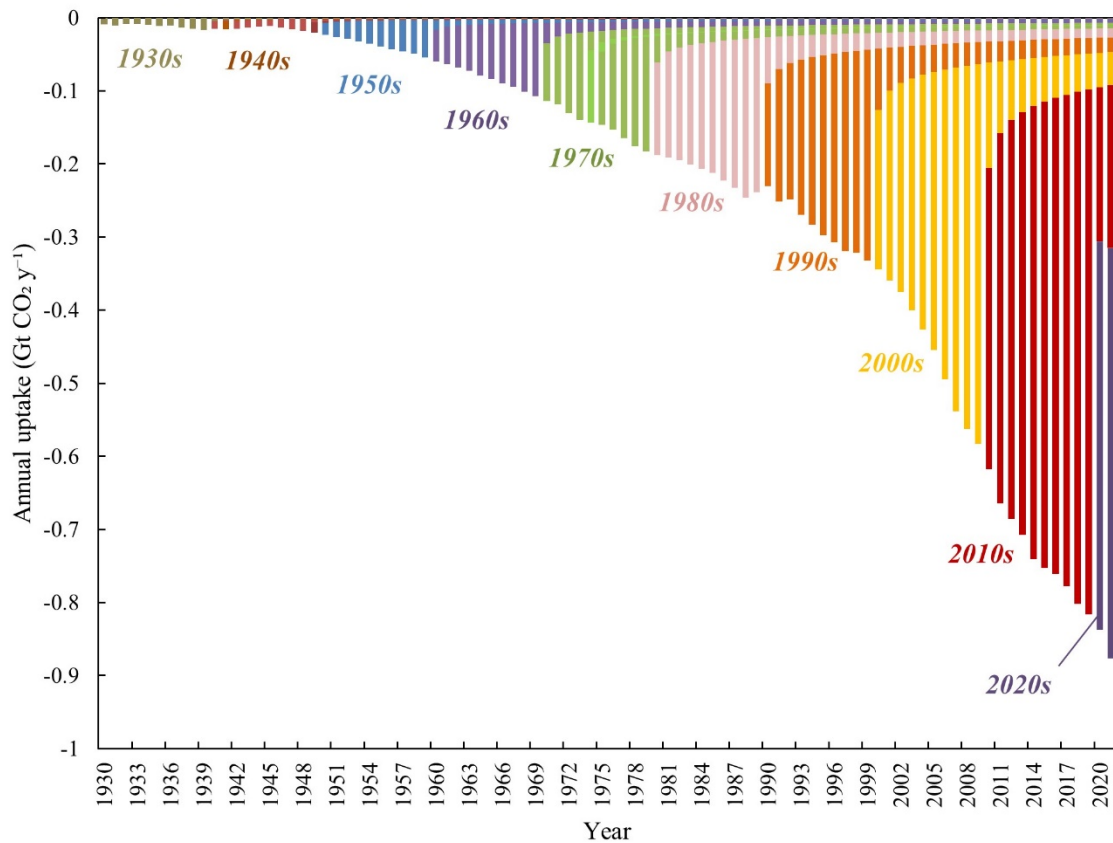

**Fig. 5** The cumulative characteristic of cement carbon uptake. The colour-coded bar areas represent the amount of uptake by the cement produced/consumed in each decade from 1930 to 2021. The fractions of uptake that occurred in each decade post-1990 are

annotated. The “tails” indicate that cement produced in a certain time will keep absorbing CO<sub>2</sub> beyond its consumption use stage, and the annual uptakes are composed of current and historical contributions.

We can also learn from Fig.6 that the growth rate of historical carbon uptake spiked after the 1990s. It is noteworthy that 75.4% of the cement carbon uptake has occurred since the 1990s, larger than that of 2019 (71%). This surge can be explained by the surplus absorption in the demolition phase due to the historically produced cement in European countries during the 1930s and 1940s, on the one hand, and by the considerably increased demand for cement materials in China after the implementation of the reform and opening-up policy, on the other hand.

Besides, the offset level (55.1%) is slightly higher than our previous estimate for 1930-2019 (~52%) (Guo et al., 2021), mainly due to the rapid increase demands from ROW during covid pandemic (Schlorke et al., 2020).



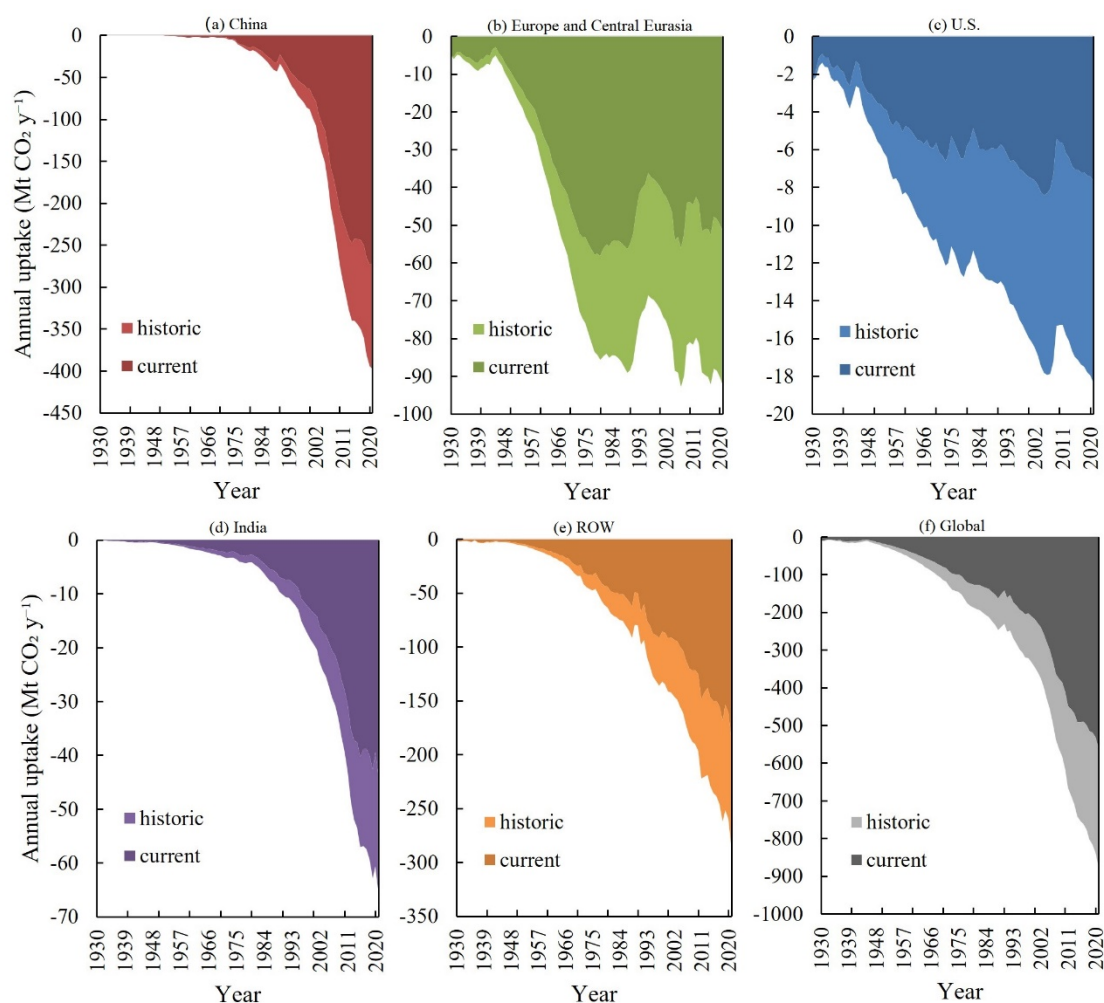

**Fig. 6 Annual cement carbon uptake by cement material and region**

Figure 7 traces the cumulative cement process CO<sub>2</sub> emissions between 1930 and 2021 according to regional production and use of cement in different materials, and to the life cycle of each type of materials. From regional perspective, between 1930 and 2021, 6%, 32%, 23%, 6% and 34% CO<sub>2</sub> emissions from cement production are from United States, China, Europe, India and rest of world, respectively. For cement material, the CO<sub>2</sub> emissions are 68% from concrete, 27% from mortar, 2% from loss cement in construction stage and 3% from CKD generation. The CO<sub>2</sub> emissions are 83% in service life cement, 6% attributed to demolished cement, and 11% attributed to demolition cement landfill and recycling. Overall, the emissions during 1930 -2021, are sequestered by cement materials and 43% are remaining in atmosphere.



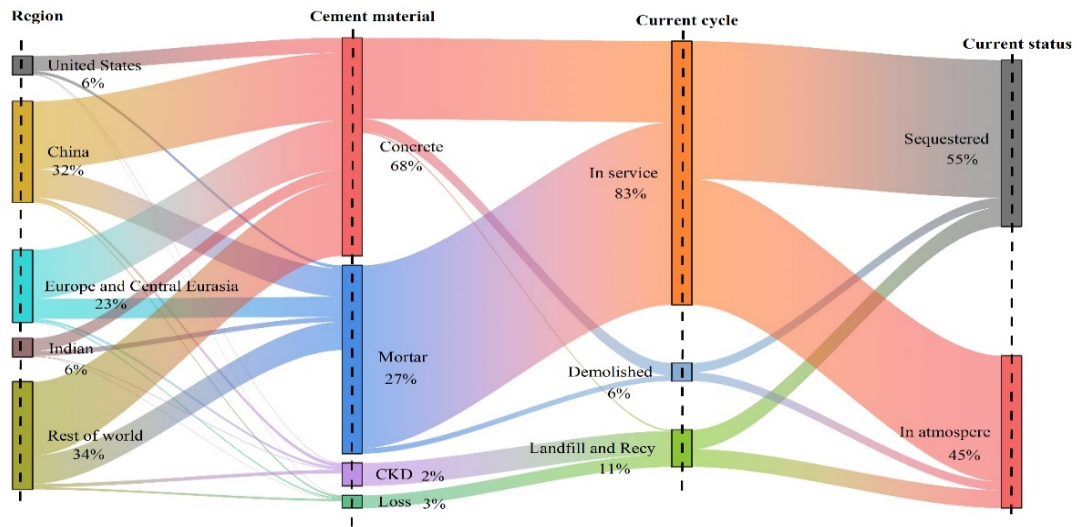

Fig. 7 Allocations of global accumulated cement process emissions 1930–2013

### 3.4 Uncertainty analysis

The estimates of cement carbon uptake and emissions underwent through uncertainty analysis utilizing Monte Carlo simulation. The findings reveal that the 95% confidence interval for cumulative carbon uptake spanning from 1930 to 2021 ranges from 19.6 to 26.6 Gt CO<sub>2</sub>, while the cumulative emissions exhibit a range of 38.7 to 47.2 Gt CO<sub>2</sub>, as presented in SI-Table 4.

Through executing an OAT sensitivity analysis that use China's carbon uptake simulation as an illustrative case (Fig. 8), Overall, the main influential parameters can be categorized as cement material properties, carbonation efficiency parameters, and environmental factors three parts. Notably, cement material properties encompassing factors such as clinker to cement ratio (100%), correction factors related to cement additives (96.1%), and CaO content in clinker (90.9%) exerted the most substantial impact, given their direct influence on the scale of carbon uptake. Carbonation efficiency parameters encompassing the proportions of CaO converted to CaCO<sub>3</sub> for concrete and mortar, introduced significant uncertainty at levels of 57.2% and 38.9%, respectively. This underscores the pivotal role that carbonation efficiency uncertainty plays in determining outcomes. Environmental factors primarily encapsulated by the CO<sub>2</sub> concentration correction factor, took responsible for 88.2% of the uncertainty in

365 predictions. Consequently, ambient CO<sub>2</sub> levels exercise a notable sway over the degree  
366 of result uncertainty. The uncertainty analysis provides a quantitative basis for assessing  
367 the influence of different factors on carbon uptake. Further collecting measured data  
368 and improving certainty of key parameters in the future will help reduce result  
369 uncertainty and improve estimation accuracy.

370 Furthermore, in order to establish the validity of this study, we attempted cross-  
371 validation. Generally, the coverage of the global cement carbonation uptake within the  
372 existing research is limited, with only a handful of studies (Xi et al., 2016; Guo et al.,  
373 2021; Cao et al., 2020) delving into this area. The majority of research focuses solely  
374 on specific regions, like Spain (Sanjuán, et al., 2020), Nordic countries (Pade and  
375 Guimaraes, 2007) or particular structures, such as The Itaipu Dam (Possan et al., 2017).  
376 Moreover, there is a notable discrepancy in the methodologies employed among studies  
377 that share similar scopes. Notably, the iterative updating approach is utilized in various  
378 studies but with distinct variations. For instance, Guo's research method builds upon  
379 the foundation established by Xi's work, a progression that Guo elaborates on in their  
380 paper (Guo et al., 2021).

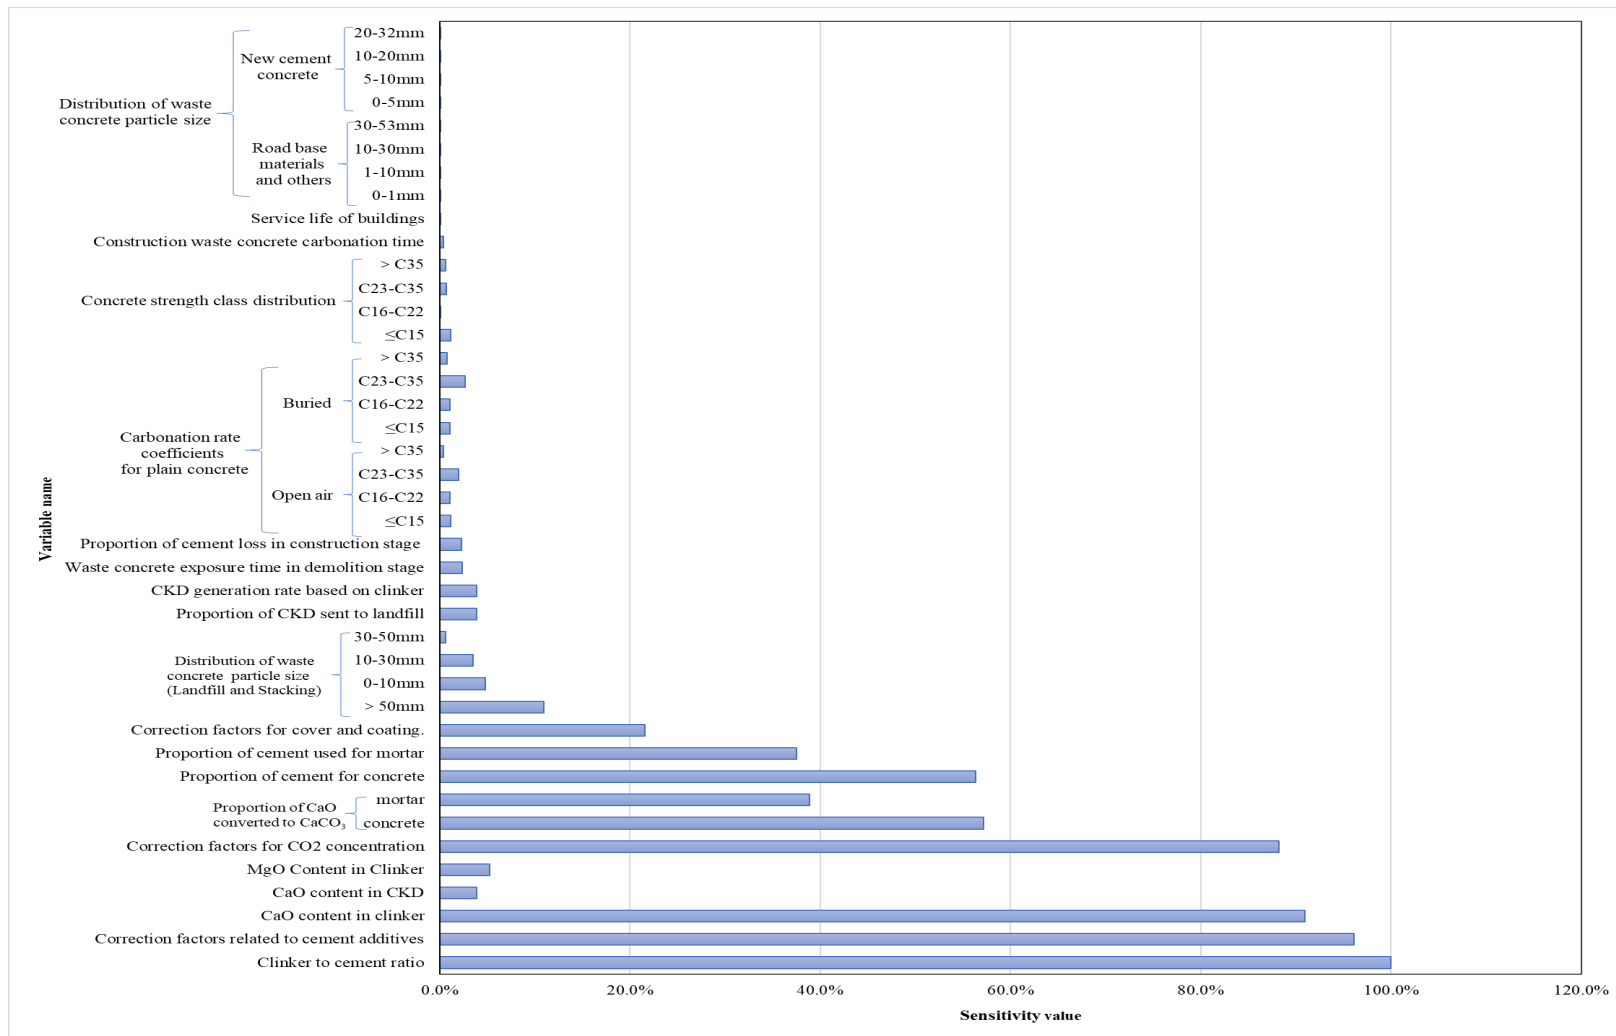

Fig.8 Sensitivity analysis of cement carbon uptake taking China's carbon uptake simulation as an illustrative case

#### **4. Data availability**

All the original datasets used for estimating the emission and uptake in this study and the resulting datasets themselves from the simulation as well as the associated uncertainties are made available by Zenodo at <https://doi.org/10.5281/zenodo.7516373> (Bing et al., 2023).

#### **5. Conclusions**

Due to the unique characteristics of carbon uptake by cement, it is imperative to conduct a scientific and comprehensive estimation of cement carbon uptake. This is crucial for accurately assessing the environmental impact of the cement industry and supporting global carbon neutrality goals. From a kinetic standpoint, cement carbon uptake is a dynamic process that occurs during various stages, including production/consumption, demolition, and reuse. Therefore, it is highly significant to incorporate historical cement legacy sequestration and utilize dynamic clinker ratios to enhance the comprehensiveness and accuracy of estimation. Our objective in this study is to update our data in the temporal dimension, while maintaining consistency with our previous work in terms of methodology. Updating the data within the same framework will enhance the completeness of our database, thereby providing a reliable data foundation for our future forecasting endeavours.

Based on our estimations, the cumulative carbon uptake by cement materials from 1930 to 2021 amounts to 22.90 Gt CO<sub>2</sub> (with a 95% Confidence Interval, CI: 19.64-26.64 Gt CO<sub>2</sub>). Mortar contributes approximately 58.5% of the total uptake, effectively offsetting 55.1% of the cumulative process emissions.

This dataset and estimation methodology can be employed as a valuable set of tools for evaluating cement carbon emissions and uptake throughout the dynamic processes encompassing the entire cement life cycle. While per capita cement stocks in Europe and the United States are reaching saturation levels, China has emerged as the dominant region in cement production and consumption following the implementation of China's reform and opening-up policy. Considering that cement demand in China and other

developing countries is expected to continue increasing, it becomes evident that this trend will impact the assessment of global carbon neutrality. Therefore, it is crucial to make further efforts to improve the accuracy of cement carbon uptake estimation by incorporating direct clinker production data and experimentally derived spatially resolved conversion factors.

#### **Author contributions**

Zi Huang prepared, reviewed, and edited the manuscript with assistance from Jiaoyue Wang, Yijiao Qiu, Longfei Bing, Ying Yu, Rui Guo, Mingjing Ma, Le Niu, Zhu Liu and Fengming Xi. Zi Huang performed the analyses with support from Jiaoyue Wang, Mingjing Ma, Le Niu and Ying Yu on analytical approaches and figure making. Zi Huang, Jiaoyue Wang, and Longfei Bing, Yijiao Qiu curated the datasets. Longfei Bing, Fengming Xi and Zi Huang developed the code and performed the simulations with support from Yijiao Qiu. Dan Tong, Robbie M. Andrew, Pierre Friedlingstein and Josep G. Canadell reviewed, and edited the manuscript. Zhu Liu and Fengming Xi conceptualised and supervised the study.

#### **Competing interests**

The authors declare that they have no conflict of interest.

#### **Acknowledgements**

Jiaoyue Wang and Fengming Xi acknowledge funding from the Youth Innovation Promotion Association, Chinese Academy of Sciences (2020201 and Y202050), the Natural Science Foundation of China (41977290), Liaoning Xingliao Talents Project (XLYC1907148), Major Program of Institute of Applied Ecology, Chinese Academy of Sciences (IAEMP202201). JGC thanks the support of the National Environmental Science Program – Climate Systems hub.

#### **Financial support**

This work was supported by the Youth Innovation Promotion Association, Chinese

Academy of Sciences (2020201 and Y202050), the Natural Science Foundation of China (41977290), Liaoning Xingliao Talents Project (XLYC1907148), Major Program of Institute of Applied Ecology, Chinese Academy of Sciences (IAEMP202201).

## References

Andersson, R., Fridh, K., Stripple, H., and Häglund, M.: Calculating CO<sub>2</sub> Uptake for Existing Concrete Structures during and after Service Life, *Environ. Sci. Tech. Let.*, 47, 11625–11633, <https://doi.org/10.1021/es401775w>, 2013.

Andrew, R.: Global CO<sub>2</sub> emissions from cement production, 1928–2017, *Earth Syst. Sci. Data*, 10, 2213–2239, <https://doi.org/10.5194/essd-10-2213-2018>, 2018.

Andrew, R.: Global CO<sub>2</sub> emissions from cement production, 1928–2018, *Earth Syst. Sci. Data*, 11, 1675–1710, <https://doi.org/10.5194/essd-11-1675-2019>, 2019.

Antunes, M., Santos, R. L., Pereira, J., Rocha, P., Horta, R. B., and Colaço, R.: Alternative Clinker Technologies for Reducing Carbon Emissions in Cement Industry: A Critical Review, *Materials*, 15, 209, <https://doi.org/10.3390/ma15010209>, 2021.

Bing, L. F., Huang, H., Wang, J. Y., Xi, F. M.: Global carbon uptake of cement carbonization accounts 1930-2021, Zenodo[data set], <https://doi.org/10.5281/zenodo.7516373>, 2023.

Cao, Z., Myers, R. J., Lupton, R. C., Duan, H., Sacchi, R., Zhou, N., Miller, T. R., Cullen, J. M., Ge, Q., and Liu, G.: The sponge effect and carbon emission mitigation potentials of the global cement cycle, *Nat. Commun.*, 11, 3777, <https://doi.org/10.1038/s41467-020-17583-w>, 2020.

Cao, Z., Shen, L., Løvik, A. N., Müller, D. B., and Liu, G.: Elaborating the History of Our Cementing Societies: An in-Use Stock Perspective, *Environ. Sci. Tech. Let.*, 51, 11468–11475, <https://doi.org/10.1021/acs.est.7b03077>, 2017.

China Cement Association (CCA): China Cement Almanac, China Building Industry Press, Beijing, China, 2001–2015.

Damineli, B. L., Kemeid, F. M., Aguiar, P. S., and John, V. M.: Measuring the eco-

467 efficiency of cement use, *Cement Concrete Comp.*, 32, 555–562,  
 468 <https://doi.org/10.1016/j.cemconcomp.2010.07.009>, 2010.

469 Damtoft, J. S., Lukasik, J., Herfort, D., Sorrentino, D., and Gartner, E. M.: Sustainable  
 470 development and climate change initiatives, *Cement Concrete Res.*, 38, 115–127,  
 471 <https://doi.org/10.1016/j.cemconres.2007.09.008>, 2008.

472 EFDB: Emission Factor for CO<sub>2</sub> Emissions from Cement Production, available at:  
 473 [https://www.ipcc-nggip.iges.or.jp/EFDB/ef\\_detail.php](https://www.ipcc-nggip.iges.or.jp/EFDB/ef_detail.php), 2002.

474 Friedlingstein, P., Jones, M. W., O’Sullivan, M., Anew, R. M., Bakker, D. C. E., Hauck,  
 475 J., Quéré, C. L., Peters, G. P., Peters, W., Pongratz, J., Sitch, S., Canadell, J. G.,  
 476 Ciais, P., Jackson, R. B., Alin, S. R., Anthoni, P., Bates, N. R., Becker, M., Bellouin,  
 477 N., Bopp, L., Chau, T. T. T., Chevallier, F., Chini, L. P., Cronin, M., Currie, K. I.,  
 478 Decharme, B., Djeutchouang, L. M., Dou, X., Evans, W., Feely, R. A., Feng, L.,  
 479 Gasser, T., Gilfillan, D., Gkritzalis, T., Grassi, G., Gregor, L., Gruber, N., Gürses,  
 480 Ö., Harris, I., Houghton, R. A., Hurtt, G. C., Iida, Y., Ilyina, T., Luijkx, I. T., Jain,  
 481 A., Jones, S. D., Kato, E., Kennedy, D., Goldewijk, K. K., Knauer, J., Korsbakken,  
 482 J. I., Körtzinger, A., Landschützer, P., Lauvset, S. K., Lefèvre, N., Lienert, S., Liu,  
 483 J., Marland, G., McGuire, P. C., Melton, J. R., Munro, D. R., Nabel, J. E. M. S.,  
 484 Nakaoka, S. I., Niwa, Y., Ono, T., Pierrot, D., Poulter, B., Rehder, G., Resplandy,  
 485 L., Robertson, E., Rödenbeck, C., Rosan, T. M., Schwinger, J., Schwingshackl, C.,  
 486 Séférian, R., Sutton, A. J., Sweeney, C., Tanhua, T., Tans, P. P., Tian, H., Tilbrook,  
 487 B., Tubiello, F., Werf, G. R. V. D., Vuichard, N., Wada, C., Wanninkhof, R., Watson,  
 488 A. J., Willis, D., Wiltshire, A. J., Yuan, W., Yue, C., Yue, X., Zaehle, S., and Zeng,  
 489 J.: Global Carbon Budget 2021, *Earth Syst. Sci. Data*, 14, 1917–2005,  
 490 <https://doi.org/10.5194/essd-14-1917-2022>, 2022.

491 Global Cement Directory: Global Cement Directory - listing of all global cement plants  
 492 from Global Cement, available at: <https://www.globalcement.com/directory>, 2019

493 Guo, R., Wang, J., Bing, L., Tong, D., Ciais, P., Davis, S., Andrew, R., Xi, F., and Liu,  
 494 Z.: Global CO<sub>2</sub> uptake by cement from 1930 to 2019, *Earth Syst. Sci. Data*, 13,

1791–1805, <https://doi.org/10.5194/essd-13-1791-2021>, 2021.

Huntzinger, D. N., Gierke, J. S., Kawatra, S. K., Eisele, T. C., and Sutter, L. L.: Carbon Dioxide Sequestration in Cement Kiln Dust through Mineral Carbonation, *Environ. Sci. Tech. Let.*, 43, 1986–1992, <https://doi.org/10.1021/es802910z>, 2009.

IEA: CO<sub>2</sub> Emissions from Fuel Combustion 2019, International Energy Agency, <https://doi.org/10.1787/9789264096134-en>, 2019.

Kaliyavaradhan, S. K., Ling, T.-C., and Mo, K. H.: CO<sub>2</sub> sequestration of fresh concrete slurry waste: Optimization of CO<sub>2</sub> uptake and feasible use as a potential cement binder, *J. CO<sub>2</sub>. Util.*, 42, 101330, <https://doi.org/10.1016/j.jcou.2020.101330>, 2020.

Longfei, B., Zi, H., Jiaoyue, W., and Fengming, X.: Global carbon uptake of cement carbonization accounts 1930-2021, , 1, <https://doi.org/10.5281/zenodo.7516373>, 2022, 2023.

Low, M.-S.: Material flow analysis of concrete in the United States, S.M., Department of Architecture, Massachusetts Institute of Technology, USA, <http://hdl.handle.net/1721.1/33030>, 2005.

MIIT: Building materials, <http://www.miit.gov.cn/n1146312/n1146904/n1648356/n1648361/index.html> , last access: 22 August 2020, 2019

NBS: National data, available at: <https://data.stats.gov.cn/> (last access: 22 August 2020), 2019.

Pade, C. and Guimaraes, M.: The CO<sub>2</sub> uptake of concrete in a 100 year perspective, *Cement. Concrete. Res.*, 37, 1348–1356, <https://doi.org/10.1016/j.cemconres.2007.06.009>, 2007.

Possan, E., Thomaz, W.A., Aleandri GA, et al. CO<sub>2</sub> uptake potential due to concrete carbonation: a case study. *Case Studies in Construction Materials*. 6, 147-161, <https://www.sciencedirect.com/science/article/pii/S2214509516300493>, 2017.



Renforth, P., Washbourne, C.-L., Taylder, J., and Manning, D. A. C.: Silicate Production and Availability for Mineral Carbonation, *Environ. Sci. Tech. Let.*, 45, 2035–2041, <https://doi.org/10.1021/es103241w>, 2011.

Sanjuán, M.Á., Andrade, C., Mora, P., Zaragoza, A.: Carbon dioxide uptake by cement-based materials: a Spanish case study. *Applied Sciences*, 10(1), 339, <https://www.mdpi.com/2076-3417/10/1/339>, 2020.

Schlorke, S., Tu, L., Stec, M., Mallagray, J. V., and Kaleem, H.: The Impact of COVID-19 on the Cement Industry, International Finance Corporation, Washington, DC, 2020.

Shen, L., Zhao, J., Wang, L., Liu, L., Wang, Y., Yao, Y., Geng, Y., Gao, T., and Cao, Z.: Calculation and evaluation on carbon emission factor of cement production in China, *Chinese Sci. Bull.*, 61, 2926–2938, <https://doi.org/10.1360/N972016-00037>, 2016.

Trading Economics: Russia cement production, available at: <https://tradingeconomics.com/russia/cement-production>, 2021

Xi, F., Davis, S. J., Ciais, P., Crawford-Brown, D., Guan, D., Pade, C., Shi, T., Syddall, M., Lv, J., Ji, L., Bing, L., Wang, J., Wei, W., Yang, K.-H., Lagerblad, B., Galan, I., Andrade, C., Zhang, Y., and Liu, Z.: Substantial global carbon uptake by cement carbonation, *Nat. Geosci.*, 9, 880–883, <https://doi.org/10.1038/ngeo2840>, 2016.

Xu, J.-H., Fleiter, T., Eichhammer, W., and Fan, Y.: Energy consumption and CO<sub>2</sub> emissions in China’s cement industry: A perspective from LMDI decomposition analysis, *Energ. Policy*, 50, 821–832, <https://doi.org/10.1016/j.enpol.2012.08.038>, 2012.

Xu, J.-H., Fleiter, T., Fan, Y., and Eichhammer, W.: CO<sub>2</sub> emissions reduction potential in China’s cement industry compared to IEA’s Cement Technology Roadmap up to 2050, *Appl. Energy*, 130, 592–602, <https://doi.org/10.1016/j.apenergy.2014.03.004>, 2014.

Xuan, D., Zhan, B., Poon, C. S., and Zheng, W.: Carbon dioxide sequestration of

551 concrete slurry waste and its valorisation in construction products, Constr. Build.  
552 Mater., 113, 664–672, <https://doi.org/10.1016/j.conbuildmat.2016.03.109>, 2016.

553 Yang, K.-H., Seo, E.-A., and Tae, S.-H.: Carbonation and CO<sub>2</sub> uptake of concrete,  
554 Environ. Impact Assess. Rev., 46, 43–52,  
555 <https://doi.org/10.1016/j.eiar.2014.01.004>, 2014.

556 Yang, K.-H., Song, J.-K., and Song, K.-I.: Assessment of CO<sub>2</sub> reduction of alkali-  
557 activated concrete, J. Clean Prod., 39, 265–272,  
558 <https://doi.org/10.1016/j.jclepro.2012.08.001>, 2013.

559
