# Supplementary material for: Global carbon uptake of cement carbonation accounts 1930–2021
Source: Copernicus journal article supplement (doi:10.5194/essd-2023-203), 2023-07-04
Supplement: Supplementary file [file essd-2023-203-AC5-supplement.zip]

# 1      **Global carbon uptake of cement carbonation accounts 1930-2021**

2      Zi Huang<sup>1,3\*</sup>, Jiaoyue Wang<sup>2,8,9,\*</sup>, Longfei Bing<sup>2,8,9,\*</sup>, Yijiao Qiu<sup>1</sup>, Rui Guo<sup>1</sup>, Ying  
3      Yu<sup>4</sup>, Mingjing Ma<sup>2</sup>, Le Niu<sup>2</sup>, Dan Tong<sup>1</sup>, Robbie M. Andrew<sup>5</sup>, Pierre Friedlingstein<sup>6</sup>,  
4      Josep G. Canadell<sup>7</sup>, Fengming Xi<sup>2,8,9</sup>, Zhu Liu<sup>1</sup>

5      <sup>1</sup>Department of Earth System Science, Tsinghua University, Beijing 100084, China

6      <sup>2</sup>Institute of Applied Ecology, Chinese Academy of Sciences, Shenyang 110016,  
7      China

8      <sup>3</sup>Department of Engineering Science, University of Oxford, Oxford, OX1 3PJ, UK

9      <sup>4</sup>Department of Environmental Sciences and Engineering, University of North  
10     Carolina at Chapel Hill, Chapel Hill 27599, United States

11     <sup>5</sup>CICERO Center for International Climate Research, Oslo 0349, Norway

12     <sup>6</sup>Department of mathematic and statistics, University of Exeter, Exeter, EX4 4QF, UK

13     <sup>7</sup>CSIRO Environment, Canberra, ACT 2601, Australia

14     <sup>8</sup> Key Laboratory of Pollution Ecology and Environmental Engineering, Chinese  
15     Academy of Sciences, Shenyang 110016, China

16     <sup>9</sup>Key Laboratory of Terrestrial Ecosystem Carbon Neutrality, Liaoning Province,  
17     China

18     \*These authors contributed equally to this work.

19     Correspondence:    Fengming    Xi    ([xifengming@iae.ac.cn](mailto:xifengming@iae.ac.cn))    and    Zhu    Liu  
20     ([zhuliu@tsinghua.edu.cn](mailto:zhuliu@tsinghua.edu.cn) )

## 21      **Abstract:**

22      The main contributor to the GHG footprint of the cement industry is the  
23      decomposition of alkaline carbonates during clinker production. However, systematic  
24      accounts for the reverse of this process - namely carbonation of calcium oxide and other  
25      alkaline oxides/hydroxides within cement materials during cements' life cycle have  
26      only recently been undertaken. Here, adopting a comprehensive analytical model, we

27 provide the most updated estimates of CO<sub>2</sub> uptake by cement carbonation. The  
28 accumulated amount of global CO<sub>2</sub> uptake by cements produced from 1930 to 2021 is  
29 estimated to be 22.9 Gt CO<sub>2</sub> (95% Confidence interval, CI: 19.6-26.6 Gt CO<sub>2</sub>). **This**  
30 **amount includes the CO<sub>2</sub> uptake by concrete, mortar, and construction waste and kiln**  
31 **dust, accounting for 30.1%, 58.5%, 4.0% and 7.1% respectively.** The cumulative carbon  
32 uptake by cement materials from 1930 to 2021 offsets 55.1% of the emissions from  
33 cement production (41.6 Gt CO<sub>2</sub>, 95% CI: 38.7-47.2 Gt CO<sub>2</sub>) over the same period,  
34 with the greater part coming from mortar (58.5% of the total uptake). China has the  
35 highest cement carbon uptake, with cumulative carbonation of 7.06 Gt CO<sub>2</sub> (95% CI:  
36 5.22-9.44 Gt CO<sub>2</sub>) since 1930. **In addition, the carbon uptake amounts of USA, EU,**  
37 **India and rest of the world took 5.0%, 23.2%, 5.6% and 34.8% separately.** As a result  
38 of rapidly increased production in recent year, over three-quarters of the cement carbon  
39 uptake has occurred since 1990. Additionally, our results show little impact of the  
40 COVID-19 pandemic on cement production and use, with carbon uptake reaching about  
41 0.92 Gt CO<sub>2</sub> (95% CI: 0.78-1.10 Gt CO<sub>2</sub>) in 2020 and 0.96 Gt CO<sub>2</sub> (95% CI: 0.81-1.15  
42 Gt CO<sub>2</sub>) in 2021. Our uniformly formatted and most updated cement uptake inventories  
43 provide coherent data support for including cement carbon uptake into future carbon  
44 budgets from the local to global scale. The latest version contains the uptake data till  
45 2021, showing the global uptake increasing pattern and offering more usable and  
46 relevant data for evaluating cement's carbon uptake capacity. All the data described in  
47 this study are accessible at <https://doi.org/10.5281/zenodo.7516373> (Bing et al., 2023).

## 48 **1 Introduction**

49 With continued urbanization in the developing world and infrastructure projects  
50 worldwide, cement consumption has increased rapidly (Low, 2005). The cement  
51 production process is an energy-intensive and CO<sub>2</sub>-emitting process, the total CO<sub>2</sub>  
52 emission of which amounts to 5–8 % of global CO<sub>2</sub> emissions (IEA, 2019; Xuan et al.,  
53 2019; Friedlingstein et al. 2022). The worldwide average CO<sub>2</sub> emission coefficient of

54 ordinary Portland cement (OPC) is 0.86 kgCO<sub>2</sub>/kg (Damtoft et al., 2008), which  
55 comprises the release of 0.53 kgCO<sub>2</sub> /kg of clinker owing to the decomposition of  
56 limestone during calcination. While in use, though, cement materials that are exposed  
57 to air naturally undergo carbonation (Pade and Guimaraes, 2007; Renforth et al., 2011;  
58 Huntzinger et al., 2009), a physicochemical process where atmospheric CO<sub>2</sub> gradually  
59 absorbs into concrete's structure and reacts with alkaline components such as CaO in a  
60 moist environment. The main carbonation mechanisms that are responsible for the  
61 carbon uptake can be attributed to the oxides, hydroxide and silicate constituents, as  
62 described by Reactions (R1) and (R2).

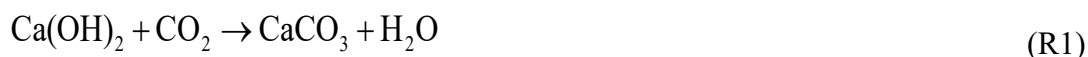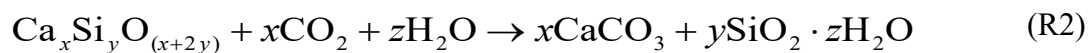

63 Unfortunately, from the perspective of offsetting emissions in the production of  
64 cement, carbonation is a slow process that occurs over the entire life-cycle of  
65 cementitious materials, in contrast to the instantaneous CO<sub>2</sub> emissions during their  
66 production (Andersson et al., 2013). It has been shown that up to a quarter of the CO<sub>2</sub>  
67 emitted in cement production can be reabsorbed throughout a building's life and  
68 recovery phase (Xi et al., 2016). Quite a few procedures for evaluating the CO<sub>2</sub> footprint  
69 over cement's lifecycle have been suggested (Damineli et al., 2010; Renforth et al.,  
70 2011; Yang et al., 2013; Cao et al., 2020). Most procedures, however, consider only a  
71 case limited system boundary and material type such as concrete service stage,  
72 recycling phase of concrete after demolition (Andersson et al., 2013; Yang et al., 2014;  
73 Xi et al., 2016; Cao et al., 2020; Kaliyavaradhan et al., 2020), and do not take other  
74 types and stages of the lifecycle into systematic account. In our previous study (Guo et  
75 al., 2021), which incorporated the merits from other work (Andersson et al., 2013; Yang  
76 et al., 2014; Xi et al., 2016; Cao et al., 2020; Kaliyavaradhan et al., 2020) and the  
77 updated clinker ratio and/or cement production data, we constructed a comprehensive  
78 analytical model to estimate the time-series of cement CO<sub>2</sub> uptake inventories and

79 estimated that 21.02 Gt CO<sub>2</sub> had been sequestered in cements produced between 1930  
80 and 2019, which abated 55% of the corresponding process emission over the same  
81 period.

82 The cement CO<sub>2</sub> uptake and emission dataset can be accounted annually. In this study,  
83 based on the previous data frameworks (Guo et al., 2021), we updated cement  
84 production and emission factors, and most up-to-date clinker ratio data of the year of  
85 2020 and 2021. Adopting previous comprehensive analytical model (Guo et al., 2021),  
86 we updated the cement CO<sub>2</sub> uptake and emission dataset from 1930 to 2021. The  
87 inventories are constructed in a uniform format, which includes cement process-related  
88 emissions and cement uptake from four material types with three life stages burned in  
89 five countries or regions. The uniformly formatted time-series cement uptake  
90 inventories can be utilized widely. Using this consistent framework and models, we  
91 provide an updated annual cement carbon uptake to be used in the annual assessments  
92 of the global carbon budget (GCB) (Friedlingstein et al., 2022). These timely updated  
93 inventories can provide robust data support for further analysis of global or regional  
94 emissions reduction policy-making, especially for carbon-intensive industry like  
95 cement manufacturing industry. By accelerating carbon capture from existing cement  
96 materials and using waste concrete as a carbon storage material, cement could reduce  
97 its net carbon emission impact. The primary focus of this research is to update the  
98 cement carbon uptake data up to 2021 using a methodology consistent with our previous  
99 publication. By doing so, we aim to provide the most current and up-to-date data to  
100 accurately portray the impact of cement carbon uptake. The data can be downloaded  
101 freely from <https://doi.org/10.5281/zenodo.7516373>.

## 102 **2 Data and Methods**

103 The cement CO<sub>2</sub> uptake and process emission in this dataset were estimated in terms  
104 of the comprehensive analytical model and based on IPCC administrative territorial-  
105 based accounting scope. In addition, we also assessed the uncertainties in cement  
106 uptake and process emission estimates using the Monte Carlo method that IPCC

107 recommended. The detail input data are in SI-Table 1 (available from:  
 108 <https://doi.org/10.5281/zenodo.7516373>). Our inventories were constructed in two  
 109 parts: process-related (cement) CO<sub>2</sub> emissions and cement material uptake. Figure 1  
 110 presents a diagram of the entire construction of our cement material carbonation uptake  
 111 and cement emission inventories.

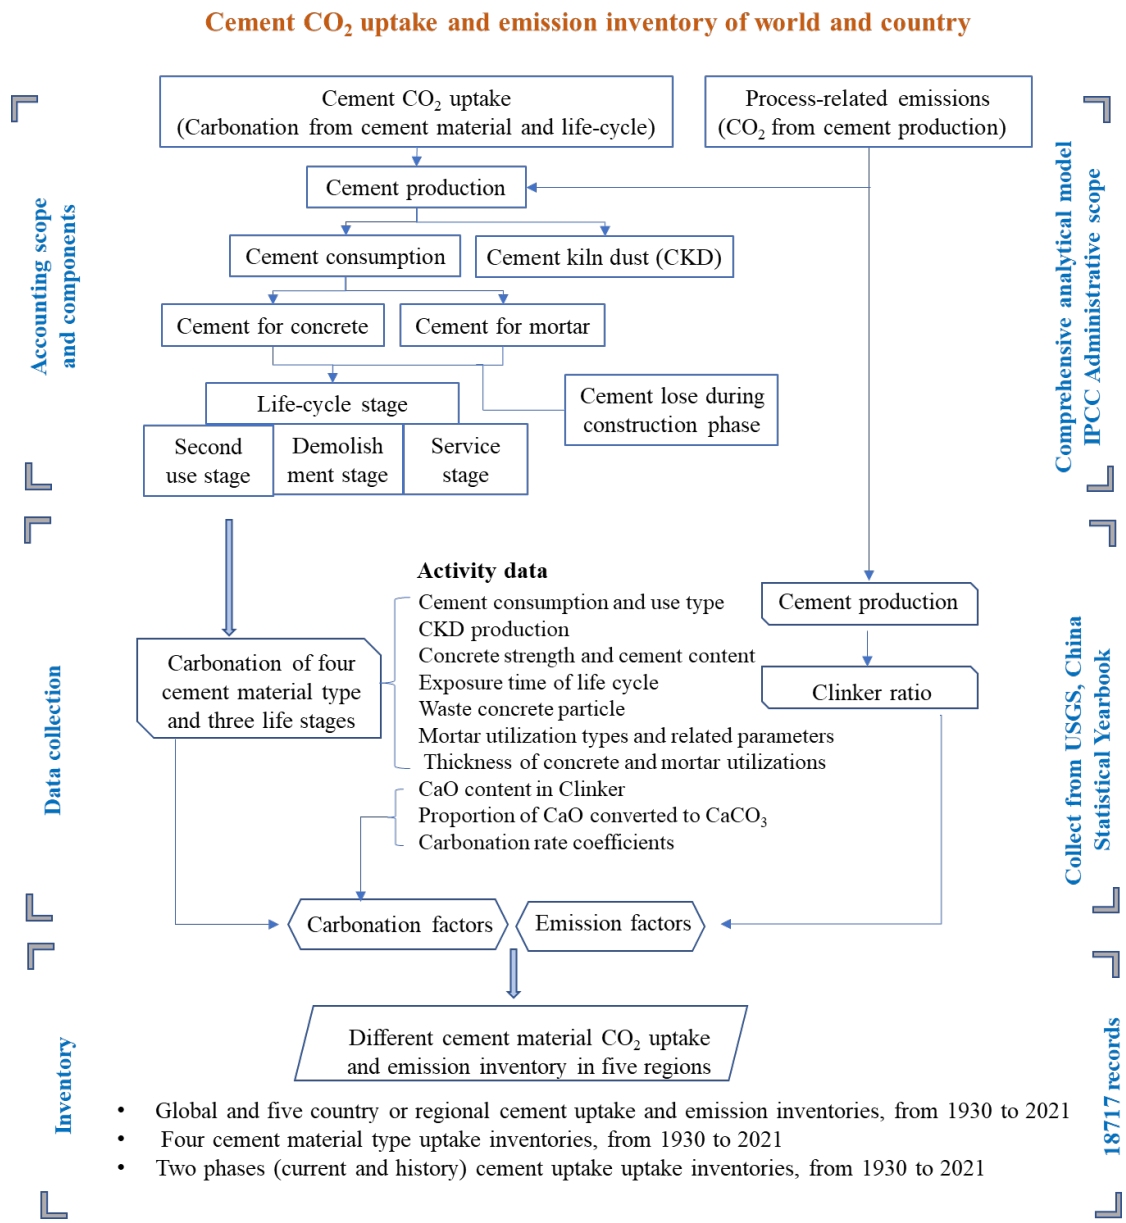

112  
 113 Figure 1. Diagram of cement CO<sub>2</sub> uptake and emission inventory construction.

114 **2.1 Cement production data sources**

115 To keep the consistency with the previous study (Xi et al., 2016; Guo et al., 2021),  
 116 we still obtained the global cement production data from 1930 to 2021 from the United

117 States Geological Survey (USGS) and geographically divided into five primary  
118 countries and aggregated regions, including China, the United States (US), Europe and  
119 central Eurasia (including Russia), India and the rest of the world (ROW). In this study,  
120 we updated cement production for year 2020 and 2021, and the global cement  
121 production was collected from USGS cement statistics and information annual report  
122 (USGS, 2022), regional cement productions were gained from China Statistical  
123 Yearbook (NBS, 2022), USGS cement annual publication (USGS, 2022), Trading  
124 Economics (2019) for China, US, Europe and Central Eurasia (including Russia) and  
125 India, respectively. The clinker ratio data was kept the same with the previous data  
126 sources (CCA et al., 2001-2005; Xu et al., 2012; Xu et al., 2014; Cao et al., 2017; MIIT,  
127 2019) except the US which was collected from USGS annual cement report (USGS,  
128 2022).

## 129 **2.2 Cement process emission calculation**

130 In producing cement clinker, the major constituent of cement (OPC), limestone  
131 together with other carbonates are decomposed into their corresponding oxides and  
132 gaseous CO<sub>2</sub> via calcination, resulting in the process emission of the cement industry.  
133 It is a so-called hard-to-abate CO<sub>2</sub> emission source (Antunes et al., 2021) because no  
134 clear avenue has yet been found to replace this chemical process. Therefore, the process  
135 emission intensity (factor) is related to the composition of the clinker and its content in  
136 the cements in question. The IPCC recommended default value of process emission  
137 factor is 0.507 kg CO<sub>2</sub> kg<sup>-1</sup> clinker (EFDB, 2002), without the emissions associated  
138 with MgCO<sub>3</sub>. In our work, the value of clinker ratio for China was taken to be 0.51966  
139 kg CO<sub>2</sub> kg<sup>-1</sup> clinker for dry with preheater without pre-calciner, dry with preheater and  
140 pre-calciner, and dry without preheater (long dry) kilns, and 0.49983 kg CO<sub>2</sub> kg<sup>-1</sup>  
141 clinker for semi-wet or semi-dry and wet or shaft kilns since 2005, as adapted from  
142 Shen's study (Shen et al., 2016). For other countries, Andrew's recent work (Andrew,  
143 2019) established a sound foundation for those who are in absence of survey data (data  
144 can be accessed from SI-Table 1 – SI data 3 from

145 <https://doi.org/10.5281/zenodo.7516373> ). Besides, the survey data was obtained from  
 146 the World Business Council for Sustainable Development (WBCSD) and the Global  
 147 Cement Directory 2019 (publicly named as the GCD-2019 dataset). Finally, the use of  
 148 integrated global plant-level capacity and technology information was maintained and  
 149 continued in this study for higher accuracy in contrast to regionally averaged cement  
 150 emission factors (Guo et al., 2021).

151 In general, the process emission can be calculated by Equation 1. **Given the current**  
 152 **types of cement additives, if statistical data on cement clinker production is available,**  
 153 **it is recommended that cement clinker production data be used directly to accurately**  
 154 **estimate process emissions (Andrew, 2019).**

$$E_{process,i} = P_{cement,i} \times f_{clinker,i} \times EF_{CO_2,i} \quad (1)$$

155 Where  $E_{process,i}$  is the cement process emission of the different regions.  $P_{cement,i}$  is  
 156 the regional cement production. The  $f_{clinker,i}$  and  $EF_{CO_2,i}$  are **actual** clinker to cement  
 157 ratios and cement (clinker) carbon emission factors of these five regions respectively.

### 158 2.3 Cement life-cycle uptake assessments

159 The cement utilization was categorized by four types: concrete, mortar, cement kiln  
 160 dust and cementitious construction wastes, which included three life stages (Xi et al.,  
 161 2016; Guo et al., 2021) named:(1) service, (2) demolition, and (3) second use. Thus,  
 162 the whole carbon uptake process can be designed as

$$C_{uptake} = C_{concrete} + C_{mortar} + C_{wastes} + C_{CKD} \quad (2)$$

$$C_{concrete} = C_{l,tl} + C_{d,td} + C_{s,ts} \quad (3)$$

$$C_{mortar} = C_{l,tl} + C_{d,td} + C_{s,ts} \quad (4)$$

163 Where  $C_{uptake}$ ,  $C_{concrete}$ ,  $C_{mortar}$ , and  $C_{waste}$  are the uptake amounts of every types.  $C_{l,tl}$ ,  
 164  $C_{d,td}$ , and  $C_{s,ts}$  are the uptake amounts during service, demolition and secondary-use  
 165 stages, respectively. Following our previous study, 100 years were considered to be the  
 166 total life-cycle time. During service stage, cement materials are mainly used for civil  
 167 infrastructures' constructions. Based on Fick's second law, a simplified model was

168 applied in this work which introduced a two-dimensional diffusion “slab” process  
169 shown in Fig. 2. Fick’s second law determines the relationship of carbonization depths  
170 and reaction time( $t$ ) linked by diffusion coefficient ( $k$ ), which can be described as:

$$d = k\sqrt{tl} \quad (5)$$

171 Then, based on the reaction of cement carbonation and IPCC’s report, the carbonation  
172 calculation can be expressed to be

$$C = f_{cement}^{clinker} \times f_{clinker}^{CaO} \times \gamma \times \frac{M_{CO_2}}{M_{CaO}} \quad (6)$$

173 Where the  $f_{cement}^{clinker}$  is clinker ratio,  $f_{clinker}^{CaO}$  is the CaO content in the clinker, and  
174  $\gamma$  is the fraction of CaO that could be converted to  $CaCO_3$ .  $M_{CO_2}$  is molar mass of  
175  $CO_2$ .  $M_{CaO}$  is molar mass of CaO.

176 In order to simplify the calculation model, some assumptions were applied in this  
177 study. Firstly, the diffusion front was assumed regarded to be the same as the  
178 carbonation front with the area behind the front was fully carbonated; and then, in the  
179 slab model shown as Fig. 2, the carbonation amounts is determined as a function of  
180 exposed surface area, carbonation depth and the cement content of concrete. Due to the  
181 influence on the carbonation process of exposure condition and materials properties, in  
182 this study, for concrete, a compressive-strength-class breakdown was carried out based  
183 on the regional standards. For mortar, the different kinds of utilization – rendering,  
184 masonry and maintenance were considered most important. Two main exposure  
185 conditions (buried and in open air) were considered, with different carbonation  
186 coefficients. **Specifically, carbon sequestration of these four types of cementitious**  
187 **materials was in the Supplement document.**



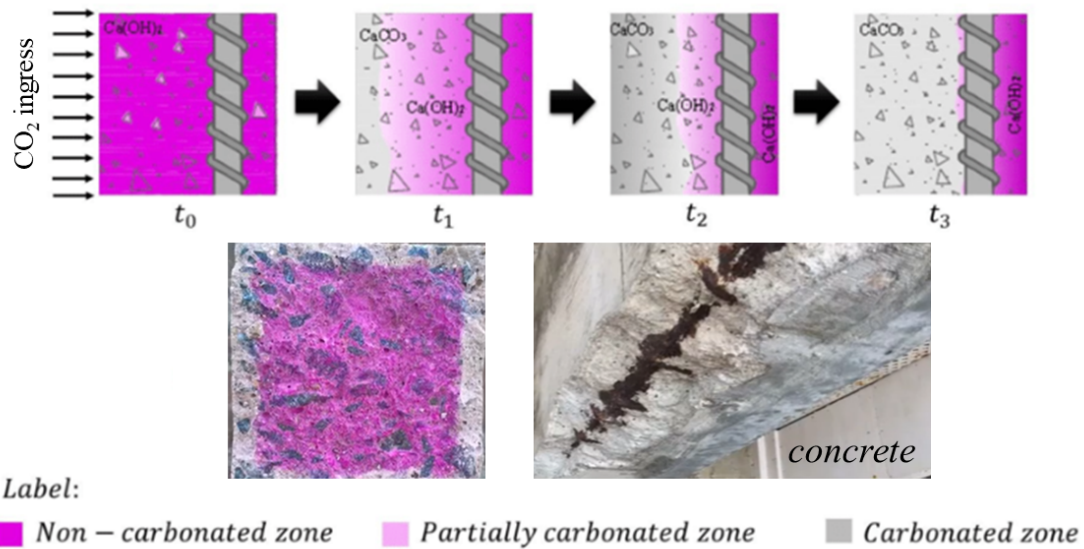

188

189 Fig 2. A schematic representation of carbonation model of concretes.

190 **2.4 Uncertainty assessment**

191 Based on the kinetic models described in previous sections, in this study, the  
 192 uncertainty estimations through Monte Carlo simulation are applied in cement process  
 193 emission and cement carbon uptake separately. The term “uncertainty” in this study  
 194 refers to the lower and upper bounds of a 95 % confidence interval (CI) around our  
 195 central estimate, i.e. median. All of the input parameters of activity levels and emission  
 196 and uptake factors, with corresponding statistical distributions, were fed into a Monte  
 197 Carlo framework, and 10 000 simulations were performed to analyse the uncertainties  
 198 in estimated carbon emissions and uptake. The uncertainty ranges of cement process  
 199 emission and carbon uptake are in SI-Table 4 (Bing et al., 2023). The previous works  
 200 (Xi et al., 2016) have illustrated the sources of uncertainties. Coherently to previous  
 201 studies (Xi et al., 2016; Guo et al., 2021), the annual global cement carbon uptake and  
 202 emission was obtained from regional or material use aggregation, which include 26  
 203 variables and factors, shown as SI-Table 2 (Bing et al., 2023). Notably, the annual  
 204 median at a higher level is not equal to the sum of its sublevel components when  
 205 evaluate the carbon uptake at each level due to the different statistics based on the  
 206 Monte Carlo simulation results (see <https://doi.org/10.5281/zenodo.7516373>; Bing et  
 207 al., 2023; Guo et al., 2021). In this work for our model used for 2020 and 2021, most

208 of the distributions and their features of variables remain and refer to the previous  
209 estimation (Guo et al., 2021). But, the clinker to cement ratio of US is updated based  
210 on USGS cement annual report of 2021, leading to a change that the random errors are  
211 within the range of  $\pm 5\%$  (a uniform distribution). Specially, the clinker ratio was set to  
212 range from 75 % to 97 % in a Weibull distribution with shape and scale parameters of  
213 91.0 % and 25 for regional aggregation of the years of 1930–2021. For China and India,  
214 the clinker ratio distribution was unchanged for 1930–1989. For China, the range of  
215 coefficient values of the clinker ratio was set to 10%–20% for 1990–2004 with a  
216 Normal distribution; for 2004–2021, the random errors were calculated within the range  
217 of  $\pm 5\%$  of the mean values with a uniform distribution. For India, the random errors  
218 were calculated within the range of  $\pm 10\%$  for 1990–2001 and  $\pm 5\%$  for 2002–2021  
219 of the mean values with a uniform distribution.

220 Meanwhile, to discern the relative contributions of distinct parameters to the  
221 uncertainty inherent in model predictions, a One-at-a-time (OAT) sensitivity analysis  
222 was executed. The OAT methodology involves altering one parameter while  
223 maintaining others constant, thereby isolating and gauging the impact of that particular  
224 parameter on the projected outcomes. By comparing the relative influence of various  
225 parameters, those that wield a more pronounced effect on model predictions become  
226 evident. Within the purview of the OAT analysis conducted here, each parameter was  
227 perturbed by +10% to discern the variables imparting considerable uncertainty to  
228 forecasted cement carbon uptake.

## 229 **3 Results and discussions**

### 230 **3.1 Global and regional CO<sub>2</sub> emissions from cement process**

231 Although, carbon reduction policies have become more stringent and technologies  
232 more effective since 2019 and accompanied by uncertainties factors that the Covid-19  
233 occurred, global CO<sub>2</sub> emissions from cement processes have been increasing rapidly  
234 over the recent past decades due to the continuous growth in the production of cement  
235 and related clinker as well, but showing a slightly lower average annual growth rate of

236 2019 (8.57%) than that of recent past decades (8.68%). According to our calculations  
237 and estimates, the global cement process CO<sub>2</sub> emissions have increased from 0.03 Gt  
238 yr<sup>-1</sup> in 1930 to 1.81 Gt yr<sup>-1</sup> in 2021. Over the period 1930-2021, global cumulative  
239 cement process CO<sub>2</sub> emissions amounted to 41.55Gt (95% CI: 38.74-47.19 Gt CO<sub>2</sub>)  
240 Specifically, around 67% was accumulated from 1930 to 1990, little fewer than that  
241 from 1930 to 2019 (71%). This illustrates that the rapid increase in cement process  
242 emissions is mainly driven by industrialization and urbanization accompanied by the  
243 development of the global economy. From 1930 to 2021, global cement production  
244 increased over 6000%, while the growth rate of CO<sub>2</sub> emissions (5547.31%) was slightly  
245 lower than that of cement production, partly due to the relative decreases in average  
246 clinker ratios from ~89 % in 1930 to ~70 % in 2019. (Wang et al., 2021).

247 The regional contribution of CO<sub>2</sub> emissions from the cement process has been altered  
248 over the period 1930-2021. As shown in Fig. 3, the CO<sub>2</sub> emissions from the cement  
249 process in each region show an overall growth trend, while the growth rate varies by  
250 country and region. Among all regions, China experienced the most dramatic increasing  
251 emission trend with an annual growth rate of 7.7% and reached 0.76Gt CO<sub>2</sub> (95%  
252 CI:0.73-0.80Gt CO<sub>2</sub>) in 2021. China contributed 33.5% of cumulative process  
253 emissions (13.91Gt CO<sub>2</sub>, 95% CI:12.44-17.00 Gt CO<sub>2</sub>) during the period 1930-2021.  
254 Meanwhile, ROW (mainly developing countries/regions), Europe, and the US were  
255 responsible for about 35.6% (14.78Gt CO<sub>2</sub>, 95% CI:13.17-17.87 Gt CO<sub>2</sub>), 23.98% (9.96  
256 Gt CO<sub>2</sub>, 95% CI:8.71-12.46 Gt CO<sub>2</sub>), and 6.3% (2.62Gt CO<sub>2</sub>, 95% CI:2.29-3.27 Gt CO<sub>2</sub>)  
257 of total cumulative emissions, respectively. India has experienced an incremental  
258 growth trend in recent years, totally emitting 2.56 Gt CO<sub>2</sub> (95% CI:2.33-3.02 Gt CO<sub>2</sub>),  
259 accounting for around 6.2% of process emissions. China and ROW kept their absolute  
260 leader role in cement CO<sub>2</sub> emissions till 2021, but the share of India has decreased  
261 significantly from ~10% to 6.2% in recent 2 years, partly because of shrink of the  
262 cement market during Covid pandemic (Schlorke et al., 2020).

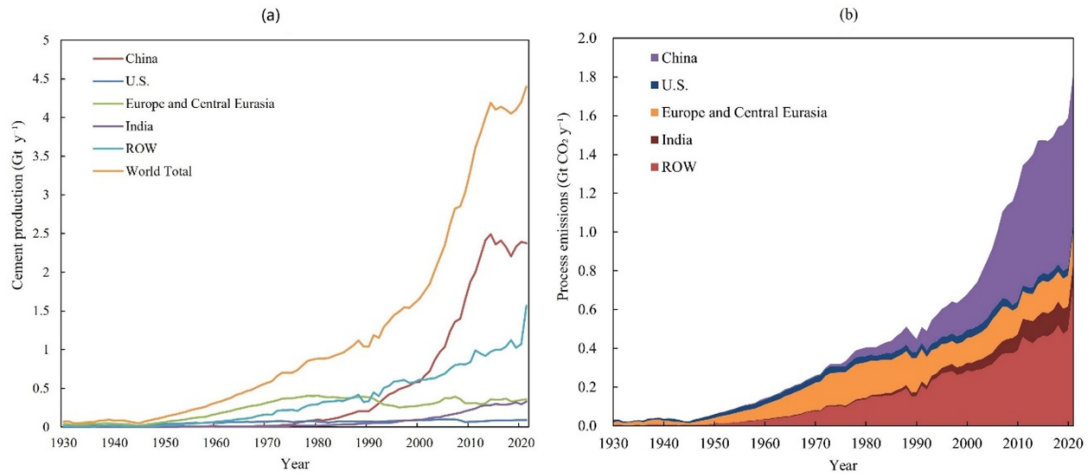

263

264 **Fig. 3** Regional and global cement production (a) and process emissions (b) from 1930

265 to 2021

266 Meanwhile, according to our calculations, there has been a persistent upward trend

267 in global cement production since 2019, which has led to a corresponding increase in

268 CO<sub>2</sub> emissions during the pandemic period (2020-2021). In 2020, global cement

269 production reached 1590.38 Mt, and this figure rose to 1819.48 Mt in 2021. Notably,

270 the ROW accounted for the highest contribution, with production increasing from

271 495.75 in 2020 to 725.83 Mt in 2021. The surge in demand for cement in 2021 can be

272 attributed to the recovery from the pandemic, which resulted in the resumption of

273 delayed construction projects (Schlorke et al., 2020).

274 However, it's important to note that China bucked this trend, experiencing a slight

275 decline in cement production from 752.40 in 2019 to 748.64 Mt in 2021, with an

276 intermediate figure of 774.45 Mt in 2020. This deviation can be attributed to China's

277 stringent policy measures and the property crisis that unfolded in 2020 and 2021. (Hale

278 et al., 2022)

### 279 3.2 Cement carbon uptake by region and material type

280 According to our estimates, the total global CO<sub>2</sub> uptake by cement reached 0.96 Gt

281 CO<sub>2</sub> (95% CI: 0.81-1.15 Gt CO<sub>2</sub>) in 2021, with an average annual growth rate of 7.9%.

282 This means that 30.8% of CO<sub>2</sub> emission from the cement process in 2021 was offset by

283 cement carbon uptake in that year. It shows that the cement uptake increasing fast

284 during around 2000-2013, then the increase rate slowed down due to the changes in  
285 cement production. with fast increase rate during ~2000-2013 then with slowed down  
286 increase rate is due to the changes in cement production Global cumulative CO<sub>2</sub> uptake  
287 by cement was estimated to be 22.90 Gt CO<sub>2</sub> (95% CI: 19.64-26.64 Gt CO<sub>2</sub>), equivalent  
288 to ~55% of the cumulative emissions over the same period. As we can see in Fig. 4, in  
289 China, cement carbon uptake has increased from 0.05 Mt in 1930 to 426.77 Mt in 2021;  
290 its cumulative uptake has reached 7.06 Gt CO<sub>2</sub> (95% CI: 5.22-9.44 Gt CO<sub>2</sub>), accounting  
291 for 30.8% of global cumulative uptake. The cement carbon uptake in China was  
292 growing exponentially, while the growth curves in the US and European countries were  
293 relatively smooth. This is mainly because the cement demand in China has observed a  
294 rapid growth in recent decades, while developed countries have been close to saturation  
295 after the 1980s. Moreover, concrete structures in developed countries have a longer  
296 service life (estimated 70 years). As for the rest of world, the total carbon uptake by  
297 cement has also increased significantly (from 0.74 Mt in 1930 to 328.23 Mt in 2021),  
298 and the growth trend in these countries was smoother than in China but more dramatic  
299 than in the US and Europe.

300 In addition, the amount of cement carbon uptake varies depending on the type of  
301 cement material. Mortar contributes the largest portion of cement carbon uptake  
302 although its application scale is much less than concrete (~73% for concrete use and  
303 ~24% for mortar use). This is because mortar, as a building decoration material, has the  
304 characteristics of small thickness, large exposed surface area, and therefore fast  
305 carbonation kinetics. According to Fig.6, in 2021, the carbon uptake by mortar and  
306 concrete were 536.85 Mt and 325.95 Mt, accounting for 55.6% and 33.8% of the total  
307 cement carbon uptake, respectively. Meanwhile, CKD and loss waste absorbed 62.60  
308 Mt (6.5%) and 34.97 Mt (3.6%) CO<sub>2</sub>, respectively.

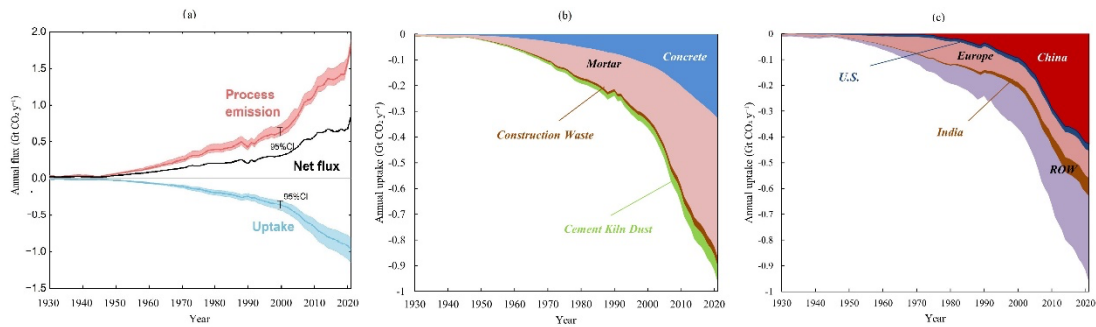

309  
310

311 **Fig. 4** Annual cement carbon uptake induced net emission (a) and cement CO<sub>2</sub> uptake  
312 by different cement materials (b) and by different country or region (c) from 1930 to  
313 2021

### 314 **3.3 Features of cement carbon uptake**

315 The cement uptake in certain year actually consists of two parts, namely the current  
316 uptake and historical uptake. The current uptake refers to the uptake from the year  
317 cement is produced, and have close relationship with the current cement production.  
318 Historical uptake refers to the uptake accumulated from year before. The natural  
319 carbonation of cement materials is a slowly dynamic process and thus the carbon uptake  
320 by cement has obvious time lag effects. As shown in Fig.7, part of carbon uptake in a  
321 given period was contributed by cement materials in previous periods. This is because  
322 the cementitious materials carbon uptake is very slow process, leading to a long time to  
323 accumulate to manifest and during the demolishment period of cement materials,  
324 crushing increases its newly exposed surface area and carbonation rate, allowing the  
325 carbon uptake capacity of cement materials to persist for a long time. With this feature,  
326 the cement carbon uptake capacity can be affected by the service life of cement  
327 buildings, and the average lifetime in China (40 years) is less than in the US and Europe  
328 (65~75 years). Therefore, countries such as China with a higher speed of cement  
329 carbonation cycle can make relatively greater contributions to cement carbon uptake.  
330 However, the majority of cement carbon uptake was still attributed to the consumption  
331 use stage, providing ~64% share in 2021.

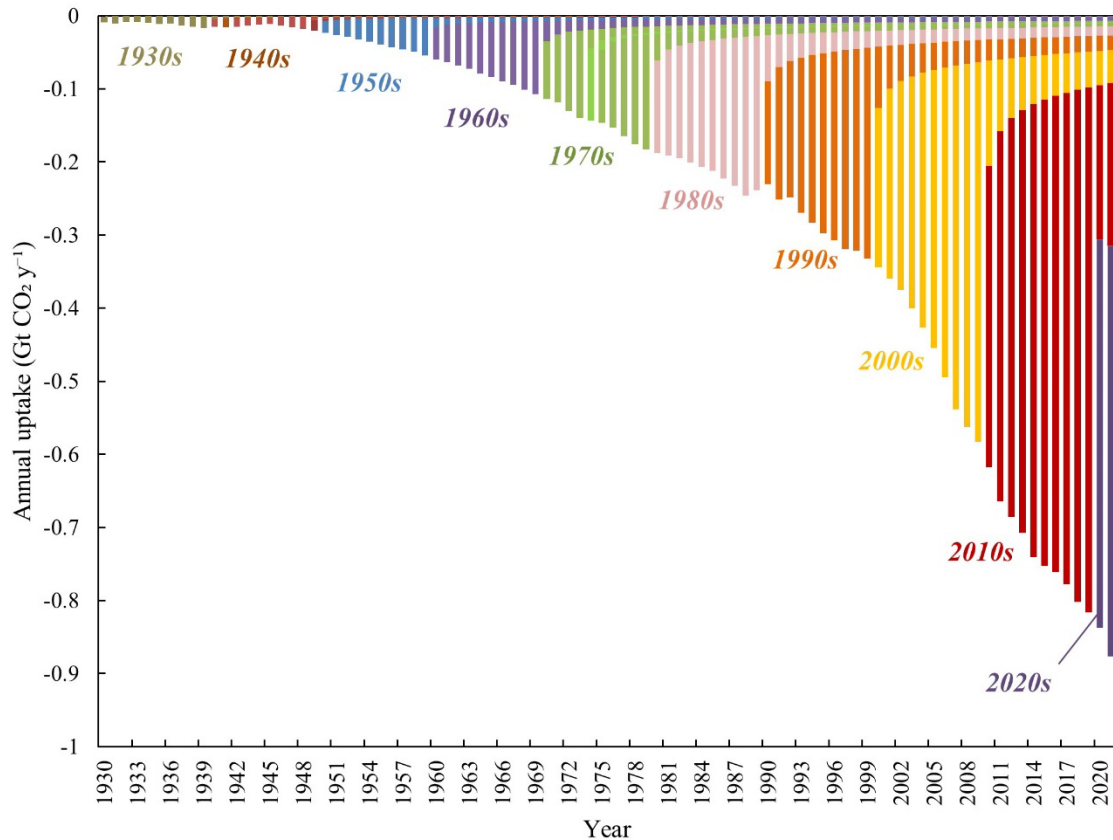

332

333 **Fig. 5** The cumulative characteristic of cement carbon uptake. The colour-coded bar  
 334 areas represent the amount of uptake by the cement produced/consumed in each decade  
 335 from 1930 to 2021. The fractions of uptake that occurred in each decade post-1990 are  
 336 annotated. The “tails” indicate that cement produced in a certain time will keep  
 337 absorbing CO<sub>2</sub> beyond its consumption use stage, and the annual uptakes are composed  
 338 of current and historical contributions.

339 We can also learn from **Fig.6** that the growth rate of historical carbon uptake spiked  
 340 after the 1990s. It is noteworthy that 75.4% of the cement carbon uptake has occurred  
 341 since the 1990s, larger than that of 2019 (71%). This surge can be explained by the  
 342 surplus absorption in the demolition phase due to the historically produced cement in  
 343 European countries during the 1930s and 1940s, on the one hand, and by the  
 344 considerably increased demand for cement materials in China after the implementation  
 345 of the reform and opening-up policy, on the other hand.

346 Besides, the offset level (55.1%) is slightly higher than our previous estimate for  
 347 1930-2019 (~52%) (Guo et al., 2021), mainly due to the rapid increase demands from  
 348 ROW during covid pandemic (Schlorke et al., 2020).

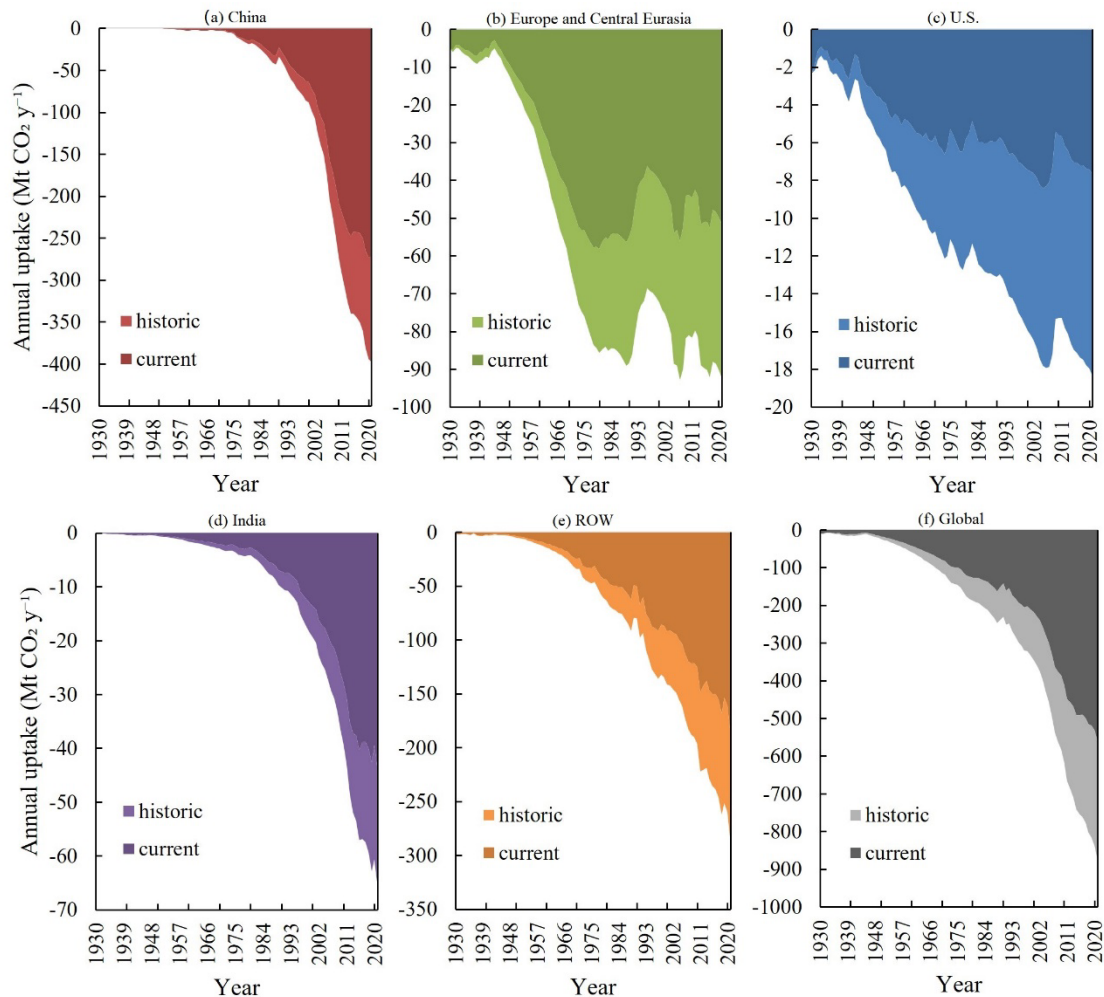

349

350 **Fig. 6** Annual cement carbon uptake by cement material and region

351 **Figure 7** traces the cumulative cement process CO<sub>2</sub> emissions between 1930 and  
 352 2021 according to regional production and use of cement in different materials, and to  
 353 the life cycle of each type of materials. From regional perspective, between 1930 and  
 354 2021, 6%, 32%, 23%, 6% and 34% CO<sub>2</sub> emissions from cement production are from  
 355 United States, China, Europe, India and rest of world, respectively. For cement material,  
 356 the CO<sub>2</sub> emissions are 68% from concrete, 27% from mortar, 2% from loss cement in  
 357 construction stage and 3% from CKD generation. The CO<sub>2</sub> emissions are 83% in  
 358 service life cement, 6% attributed to demolished cement, and 11% attributed to



359 demolition cement landfill and recycling. Overall, the emissions during 1930 -2021, are  
 360 sequestered by cement materials and 43% are remaining in atmosphere.

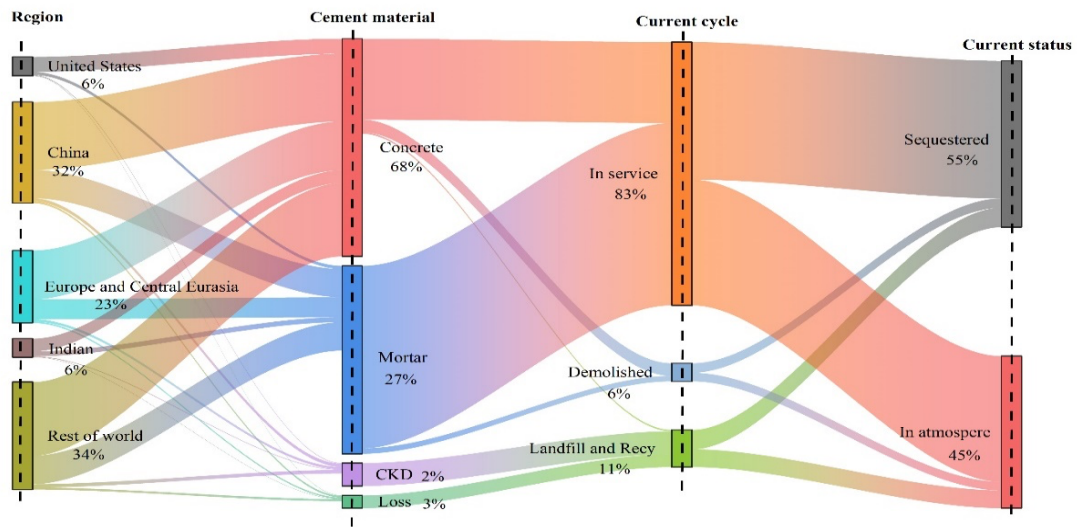

361

362 Fig. 7 Allocations of global accumulated cement process emissions 1930–2013

363 Our series of research in building cement carbon uptake accounting methods and  
 364 quantitative calculation of its carbon absorption has made up for the lack of methods in  
 365 the IPCC national greenhouse gas inventories guideline (IPCC, 2006; Xi et al., 2016),  
 366 and provided data and technical support for precise calculation of global carbon balance  
 367 and carbon neutrality. In the global carbon budget report, it has begun to consider the  
 368 impact of cement carbon sequestration on global carbon balance (Friedlingstein et al.,  
 369 2022). According to the analysis conducted in the present study, the cement materials’  
 370 annual carbon uptake in 2021 is equivalent to 7.67% of the global industrial process  
 371 emissions of CO<sub>2</sub> (Friedlingstein et al., 2022), approximately 8.23 % of the average  
 372 global land carbon sink from 2010 to 2020 (Friedlingstein et al., 2022), approximately  
 373 23.80% of the average net global forest sink from 1990 to 2007 (Pan et al., 2011). The  
 374 cement carbon sink of China alone in 2021 was about 0.43 Gt CO<sub>2</sub> yr<sup>-1</sup>, which accounts  
 375 for 48% to 60% of the terrestrial carbon sink in China during the past decades (Yang et  
 376 al., 2022). The substantial cement carbon sequestration making it one of the important  
 377 carbon sinks that cannot be ignored in the national and global carbon cycle and carbon  
 378 neutrality evaluation. Meanwhile, the carbonization of cement materials is considered

379 as one of the most promising carbon dioxide capture and storage technology. Scientists  
380 and engineers are inspired by the carbonization effect of cement to develop carbon  
381 capture, utilization and storage technologies (CCUS) by using construction waste  
382 (Skocek et al., 2020; Hargis et al., 2021). Certainly, the CCUS technology of  
383 mineralization is technically feasible, but further research is still needed to reduce  
384 economic costs and identify suitable application department scenarios. In the future,  
385 use of alkaline mineral carbon sequestration to achieve emission reduction will play an  
386 important role in achieving carbon neutrality goals (Chiang and Pan, 2017; Hargis et  
387 al., 2021).

### 388 **3.4 Uncertainty analysis**

389 The estimates of cement carbon uptake and emissions underwent through uncertainty  
390 analysis utilizing Monte Carlo simulation. The findings reveal that the 95% confidence  
391 interval for cumulative carbon uptake spanning from 1930 to 2021 ranges from 19.6 to  
392 26.6 Gt CO<sub>2</sub>, while the cumulative emissions exhibit a range of 38.7 to 47.2 Gt CO<sub>2</sub>, as  
393 presented in SI-Table 4.

394 Through executing an OAT sensitivity analysis that use China's carbon uptake  
395 simulation as an illustrative case (Fig. 8), Overall, the main influential parameters can  
396 be categorized as cement material properties, carbonation efficiency parameters, and  
397 environmental factors three parts. Notably, cement material properties encompassing  
398 factors such as clinker to cement ratio (100%), correction factors related to cement  
399 additives (96.1%), and CaO content in clinker (90.9%) exerted the most substantial  
400 impact, given their direct influence on the scale of carbon uptake. Carbonation  
401 efficiency parameters encompassing the proportions of CaO converted to CaCO<sub>3</sub> for  
402 concrete and mortar, introduced significant uncertainty at levels of 57.2% and 38.9%,  
403 respectively. This underscores the pivotal role that carbonation efficiency uncertainty  
404 plays in determining outcomes. Environmental factors primarily encapsulated by the  
405 CO<sub>2</sub> concentration correction factor, took responsible for 88.2% of the uncertainty in  
406 predictions. Consequently, ambient CO<sub>2</sub> levels exercise a notable sway over the degree

407 of result uncertainty. The uncertainty analysis provides a quantitative basis for assessing  
408 the influence of different factors on carbon uptake. Further collecting measured data  
409 and improving certainty of key parameters in the future will help reduce result  
410 uncertainty and improve estimation accuracy.

411 Furthermore, in order to establish the validity of this study, we attempted cross-  
412 validation. Generally, the coverage of the global cement carbonation uptake within the  
413 existing research is limited, with only a handful of studies (Xi et al., 2016; Guo et al.,  
414 2021; Cao et al., 2020) delving into this area. The majority of research focuses solely  
415 on specific regions, like Spain (Sanjuán, et al., 2020), Nordic countries (Pade and  
416 Guimaraes, 2007) or particular structures, such as The Itaipu Dam (Possan et al., 2017).  
417 Moreover, there is a notable discrepancy in the methodologies employed among studies  
418 that share similar scopes. Notably, the iterative updating approach is utilized in various  
419 studies but with distinct variations. For instance, Guo's research method builds upon  
420 the foundation established by Xi's work, a progression that Guo elaborates on in their  
421 paper (Guo et al., 2021).

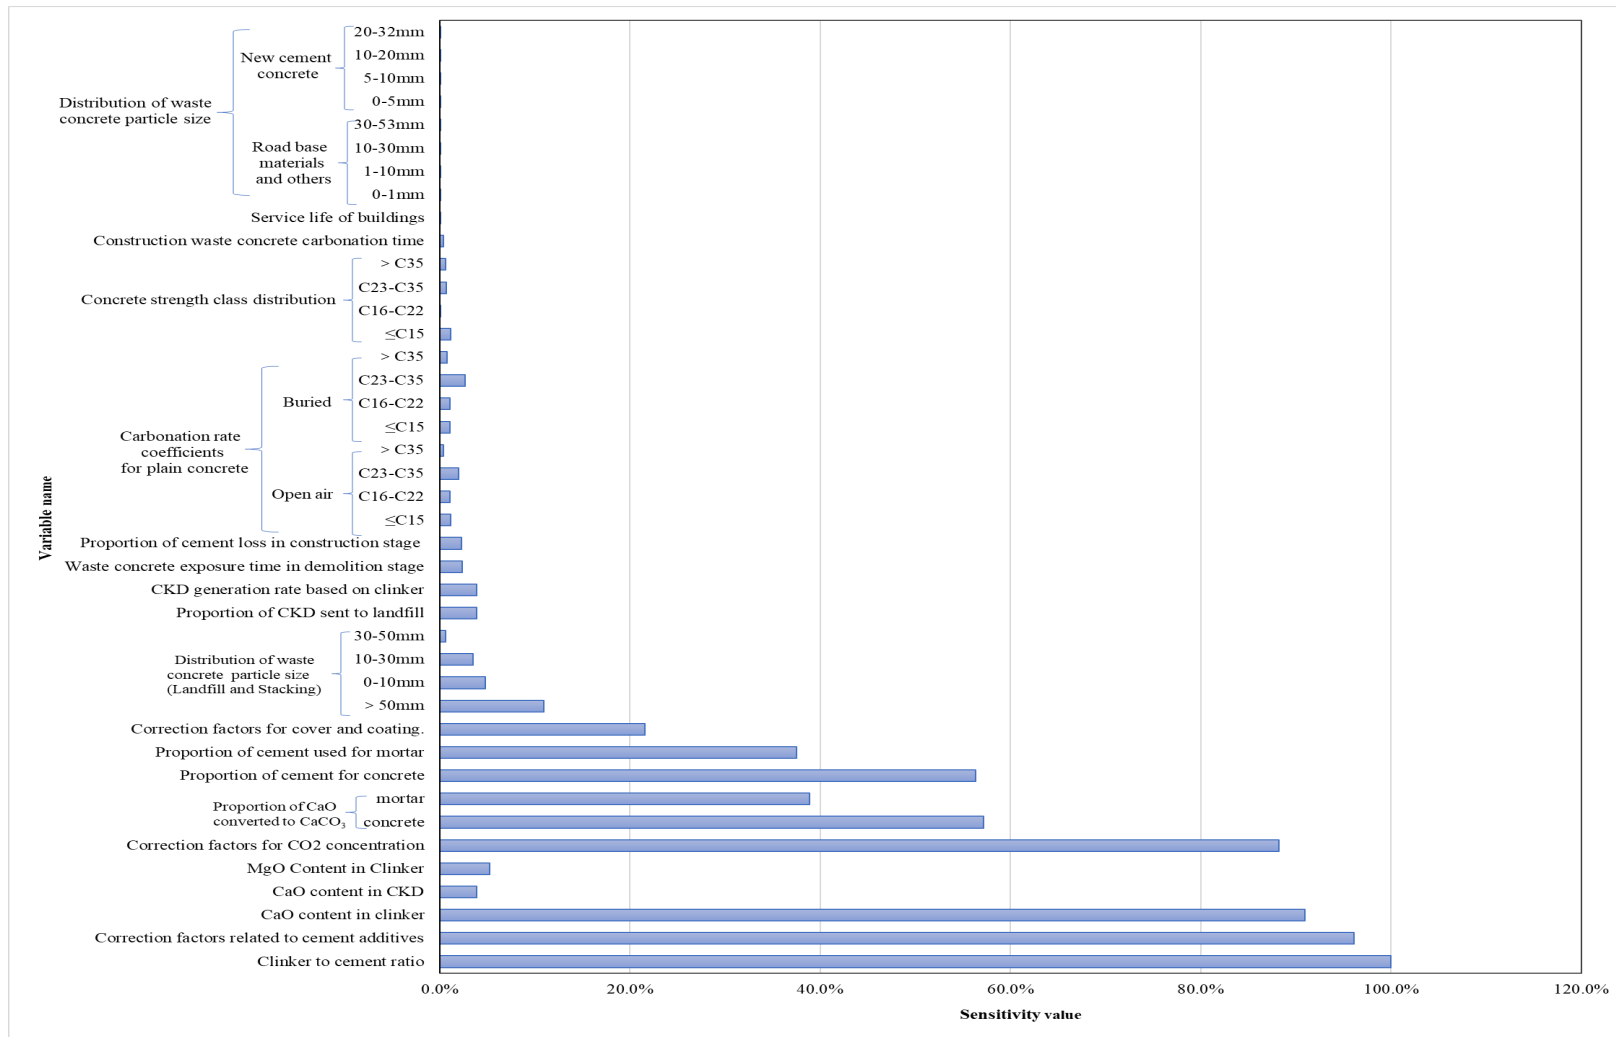

Fig.8 Sensitivity analysis of cement carbon uptake taking China's carbon uptake simulation as an illustrative case

422  
423

#### 424 **4. Data availability**

425 All the original datasets used for estimating the emission and uptake in this study and  
426 the resulting datasets themselves from the simulation as well as the associated  
427 uncertainties are made available by Zenodo at <https://doi.org/10.5281/zenodo.7516373>  
428 (Bing et al., 2023).

#### 429 **5. Conclusions**

430 Due to the unique characteristics of carbon uptake by cement, it is imperative to  
431 conduct a scientific and comprehensive estimation of cement carbon uptake. This is  
432 crucial for accurately assessing the environmental impact of the cement industry and  
433 supporting global carbon neutrality goals. From a kinetic standpoint, cement carbon  
434 uptake is a dynamic process that occurs during various stages, including  
435 production/consumption, demolition, and reuse. Therefore, it is highly significant to  
436 incorporate historical cement legacy sequestration and utilize dynamic clinker ratios to  
437 enhance the comprehensiveness and accuracy of estimation. Our objective in this study  
438 is to update our data in the temporal dimension, while maintaining consistency with our  
439 previous work in terms of methodology. Updating the data within the same framework  
440 will enhance the completeness of our database, thereby providing a reliable data  
441 foundation for our future forecasting endeavours.

442 Based on our estimations, the cumulative carbon uptake by cement materials from  
443 1930 to 2021 amounts to 22.90 Gt CO<sub>2</sub> (with a 95% Confidence Interval, CI: 19.64-  
444 26.64 Gt CO<sub>2</sub>). Mortar contributes approximately 58.5% of the total uptake, effectively  
445 offsetting 55.1% of the cumulative process emissions.

446 This dataset and estimation methodology can be employed as a valuable set of tools  
447 for evaluating cement carbon emissions and uptake throughout the dynamic processes  
448 encompassing the entire cement life cycle. While per capita cement stocks in Europe  
449 and the United States are reaching saturation levels, China has emerged as the dominant  
450 region in cement production and consumption following the implementation of China's  
451 reform and opening-up policy. Considering that cement demand in China and other

452 developing countries is expected to continue increasing, it becomes evident that this  
453 trend will impact the assessment of global carbon neutrality. Therefore, it is crucial to  
454 make further efforts to improve the accuracy of cement carbon uptake estimation by  
455 incorporating direct clinker production data and experimentally derived spatially  
456 resolved conversion factors.

#### 457 **Author contributions**

458 Zi Huang prepared, reviewed, and edited the manuscript with assistance from Jiaoyue  
459 Wang, Yijiao Qiu, Longfei Bing, Ying Yu, Rui Guo, Mingjing Ma, Le Niu, Zhu Liu and  
460 Fengming Xi. Zi Huang performed the analyses with support from Jiaoyue Wang,  
461 Mingjing Ma, Le Niu and Ying Yu on analytical approaches and figure making. Zi  
462 Huang, Jiaoyue Wang, and Longfei Bing, Yijiao Qiu curated the datasets. Longfei Bing,  
463 Fengming Xi and Zi Huang developed the code and performed the simulations with  
464 support from Yijiao Qiu. Dan Tong, Robbie M. Andrew, Pierre Friedlingstein and Josep  
465 G. Canadell reviewed, and edited the manuscript. Zhu Liu and Fengming Xi  
466 conceptualised and supervised the study.

#### 467 **Competing interests**

468 The authors declare that they have no conflict of interest.

#### 469 **Acknowledgements**

470 Jiaoyue Wang and Fengming Xi acknowledge funding from the Youth Innovation  
471 Promotion Association, Chinese Academy of Sciences (2020201 and Y202050), the  
472 Natural Science Foundation of China (41977290), Liaoning Xingliao Talents Project  
473 (XLYC1907148), Major Program of Institute of Applied Ecology, Chinese Academy of  
474 Sciences (IAEMP202201). JGC thanks the support of the National Environmental  
475 Science Program – Climate Systems hub.

476

#### 477 **Financial support**

478 This work was supported by the Youth Innovation Promotion Association, Chinese  
479 Academy of Sciences (2020201 and Y202050), the Natural Science Foundation of

480 China (41977290), Liaoning Xingliao Talents Project (XLYC1907148), Major Program  
481 of Institute of Applied Ecology, Chinese Academy of Sciences (IAEMP202201).

## 482 **References**

483 Andersson, R., Fridh, K., Stripple, H., and Häglund, M.: Calculating CO<sub>2</sub> Uptake for  
484 Existing Concrete Structures during and after Service Life, *Environ. Sci. Tech. Let.*,  
485 47, 11625–11633, <https://doi.org/10.1021/es401775w>, 2013.

486 Andrew, R.: Global CO<sub>2</sub> emissions from cement production, 1928–2017, *Earth Syst.*  
487 *Sci. Data*, 10, 2213–2239, <https://doi.org/10.5194/essd-10-2213-2018>, 2018.

488 Andrew, R.: Global CO<sub>2</sub> emissions from cement production, 1928–2018, *Earth Syst.*  
489 *Sci. Data*, 11, 1675–1710, <https://doi.org/10.5194/essd-11-1675-2019>, 2019.

490 Antunes, M., Santos, R. L., Pereira, J., Rocha, P., Horta, R. B., and Colaço, R.:  
491 Alternative Clinker Technologies for Reducing Carbon Emissions in Cement  
492 Industry: A Critical Review, *Materials*, 15, 209,  
493 <https://doi.org/10.3390/ma15010209>, 2021.

494 Bing, L. F., Huang, H., Wang, J. Y., Xi, F. M.: Global carbon uptake of cement  
495 carbonization accounts 1930-2021, Zenodo[data set],  
496 <https://doi.org/10.5281/zenodo.7516373>, 2023.

497 Cao, Z., Myers, R. J., Lupton, R. C., Duan, H., Sacchi, R., Zhou, N., Miller, T. R.,  
498 Cullen, J. M., Ge, Q., and Liu, G.: The sponge effect and carbon emission  
499 mitigation potentials of the global cement cycle, *Nat. Commun.*, 11, 3777,  
500 <https://doi.org/10.1038/s41467-020-17583-w>, 2020.

501 Cao, Z., Shen, L., Løvik, A. N., Müller, D. B., and Liu, G.: Elaborating the History of  
502 Our Cementing Societies: An in-Use Stock Perspective, *Environ. Sci. Tech. Let.*,  
503 51, 11468–11475, <https://doi.org/10.1021/acs.est.7b03077>, 2017.

504 China Cement Association (CCA): China Cement Almanac, China Building Industry  
505 Press, Beijing, China, 2001–2015.

506 **Chiang, P.C., Pan, S.Y. CO<sub>2</sub> Mineralization and Utilization via Accelerated Carbonation.**  
507 **In: Carbon Dioxide Mineralization and Utilization. Springer, Singapore.**

508 [https://doi.org/10.1007/978-981-10-3268-4\\_3](https://doi.org/10.1007/978-981-10-3268-4_3), 2017.

509 Damineli, B. L., Kemeid, F. M., Aguiar, P. S., and John, V. M.: Measuring the eco-  
510 efficiency of cement use, *Cement Concrete Comp.*, 32, 555–562,  
511 <https://doi.org/10.1016/j.cemconcomp.2010.07.009>, 2010.

512 Damtoft, J. S., Lukasik, J., Herfort, D., Sorrentino, D., and Gartner, E. M.: Sustainable  
513 development and climate change initiatives, *Cement Concrete Res.*, 38, 115–127,  
514 <https://doi.org/10.1016/j.cemconres.2007.09.008>, 2008.

515 EFDB: Emission Factor for CO<sub>2</sub> Emissions from Cement Production, available at:  
516 [https://www.ipcc-nggip.iges.or.jp/EFDB/ef\\_detail.php](https://www.ipcc-nggip.iges.or.jp/EFDB/ef_detail.php), 2002.

517 Friedlingstein, P., Jones, M. W., O’Sullivan, M., Anew, R. M., Bakker, D. C. E., Hauck,  
518 J., Quéré, C. L., Peters, G. P., Peters, W., Pongratz, J., Sitch, S., Canadell, J. G.,  
519 Ciais, P., Jackson, R. B., Alin, S. R., Anthoni, P., Bates, N. R., Becker, M., Bellouin,  
520 N., Bopp, L., Chau, T. T. T., Chevallier, F., Chini, L. P., Cronin, M., Currie, K. I.,  
521 Decharme, B., Djeutchouang, L. M., Dou, X., Evans, W., Feely, R. A., Feng, L.,  
522 Gasser, T., Gilfillan, D., Gkritzalis, T., Grassi, G., Gregor, L., Gruber, N., Gürses,  
523 Ö., Harris, I., Houghton, R. A., Hurtt, G. C., Iida, Y., Ilyina, T., Luijkx, I. T., Jain,  
524 A., Jones, S. D., Kato, E., Kennedy, D., Goldewijk, K. K., Knauer, J., Korsbakken,  
525 J. I., Körtzinger, A., Landschützer, P., Lauvset, S. K., Lefèvre, N., Lienert, S., Liu,  
526 J., Marland, G., McGuire, P. C., Melton, J. R., Munro, D. R., Nabel, J. E. M. S.,  
527 Nakaoka, S. I., Niwa, Y., Ono, T., Pierrot, D., Poulter, B., Rehder, G., Resplandy,  
528 L., Robertson, E., Rödenbeck, C., Rosan, T. M., Schwinger, J., Schwingshackl, C.,  
529 Séférian, R., Sutton, A. J., Sweeney, C., Tanhua, T., Tans, P. P., Tian, H., Tilbrook,  
530 B., Tubiello, F., Werf, G. R. V. D., Vuichard, N., Wada, C., Wanninkhof, R., Watson,  
531 A. J., Willis, D., Wiltshire, A. J., Yuan, W., Yue, C., Yue, X., Zaehle, S., and Zeng,  
532 J.: Global Carbon Budget 2021, *Earth Syst. Sci. Data*, 14, 1917–2005,  
533 <https://doi.org/10.5194/essd-14-1917-2022>, 2022.

534 Global Cement Directory: Global Cement Directory - listing of all global cement plants  
535 from Global Cement, available at: <https://www.globalcement.com/directory>, 2019



536 Guo, R., Wang, J., Bing, L., Tong, D., Ciais, P., Davis, S., Andrew, R., Xi, F., and Liu,  
537 Z.: Global CO<sub>2</sub> uptake by cement from 1930 to 2019, *Earth Syst. Sci. Data*, 13,  
538 1791–1805, <https://doi.org/10.5194/essd-13-1791-2021>, 2021.

539 Hargis, C.W., Chen, I.A., Devenney, M., et al. Calcium carbonate cement: a carbon  
540 capture, utilization, and storage (CCUS) technique, *Materials*, 14(11): 2709, 2021.

541 Hale, Thomas., Telling, Oliver.,and Lin, Andy.: China property woes trigger decline in  
542 global cement output. *Financial Times*. [https://www.ft.com/content/9e645c53-](https://www.ft.com/content/9e645c53-d3c2-4c73-951f-d2373de0e5ec)  
543 [d3c2-4c73-951f-d2373de0e5ec](https://www.ft.com/content/9e645c53-d3c2-4c73-951f-d2373de0e5ec), 2022.

544 Huntzinger, D. N., Gierke, J. S., Kawatra, S. K., Eisele, T. C., and Sutter, L. L.: Carbon  
545 Dioxide Sequestration in Cement Kiln Dust through Mineral Carbonation, *Environ. Sci.*  
546 *Tech. Let.*, 43, 1986–1992, <https://doi.org/10.1021/es802910z>, 2009.

547 IEA: CO<sub>2</sub> Emissions from Fuel Combustion 2019, International Energy Agency,  
548 <https://doi.org/10.1787/9789264096134-en>, 2019.

549 IPCC: IPCC guidelines for national greenhouse gas inventories, Institute for Global  
550 Environmental Strategies (IGES), Hayama (Japan), 2006.

551 Kaliyavaradhan, S. K., Ling, T.-C., and Mo, K. H.: CO<sub>2</sub> sequestration of fresh concrete  
552 slurry waste: Optimization of CO<sub>2</sub> uptake and feasible use as a potential cement  
553 binder, *J. CO<sub>2</sub>. Util.*, 42, 101330, <https://doi.org/10.1016/j.jcou.2020.101330>,  
554 2020.

555 Longfei, B., Zi, H., Jiaoyue, W., and Fengming, X.: Global carbon uptake of cement  
556 carbonization accounts 1930-2021, , 1, <https://doi.org/10.5281/zenodo.7516373>,  
557 [2022](https://doi.org/10.5281/zenodo.7516373), 2023.

558 Low, M.-S.: Material flow analysis of concrete in the United States, S.M., Department  
559 of Architecture, Massachusetts Institute of Technology, USA,  
560 <http://hdl.handle.net/1721.1/33030>, 2005.

561 MIT: Building  
562 materials, <http://www.mit.gov.cn/n1146312/n1146904/n1648356/n1648361/ind>  
563 [ex.html](http://www.mit.gov.cn/n1146312/n1146904/n1648356/n1648361/ind) , last access: 22 August 2020, 2019

564 NBS: National data, available at: <https://data.stats.gov.cn/> (last access: 22 August 2020),  
565 2019.

566 Pan Y, Birdsey R A, Fang JY, et al. A large and persistent carbon sink in the world's  
567 forests. *Science*, 2011, 333, 988–993.

568 Pade, C. and Guimaraes, M.: The CO<sub>2</sub> uptake of concrete in a 100 year perspective,  
569 *Cement. Concrete. Res.*, 37, 1348–1356,  
570 <https://doi.org/10.1016/j.cemconres.2007.06.009>, 2007.

571 Possan, E., Thomaz, W.A., Aleandri GA, et al. CO<sub>2</sub> uptake potential due to concrete  
572 carbonation: a case study. *Case Studies in Construction Materials*. 6, 147-161,  
573 <https://www.sciencedirect.com/science/article/pii/S2214509516300493>, 2017.

574

575 Renforth, P., Washbourne, C.-L., Taylder, J., and Manning, D. A. C.: Silicate Production  
576 and Availability for Mineral Carbonation, *Environ. Sci. Tech. Let.*, 45, 2035–2041,  
577 <https://doi.org/10.1021/es103241w>, 2011.

578 Sanjuán, M.Á., Andrade, C., Mora, P., Zaragoza, A.: Carbon dioxide uptake by cement-  
579 based materials: a Spanish case study. *Applied Sciences*, 10(1), 339,  
580 <https://www.mdpi.com/2076-3417/10/1/339>, 2020.

581 Schlorke, S., Tu, L., Stec, M., Mallagray, J. V., and Kaleem, H.: The Impact of COVID-  
582 19 on the Cement Industry, International Finance Corporation, Washington, DC,  
583 2020.

584 Skocek, J., Zajac, M., Haha, M.B. Carbon capture and utilization by mineralization of  
585 cement pastes derived from recycled concrete. *Scientific Reports*, 10:5614. 2020.

586 Shen, L., Zhao, J., Wang, L., Liu, L., Wang, Y., Yao, Y., Geng, Y., Gao, T., and Cao, Z.:  
587 Calculation and evaluation on carbon emission factor of cement production in  
588 China, *Chinese Sci. Bull.*, 61, 2926–2938, [https://doi.org/10.1360/N972016-](https://doi.org/10.1360/N972016-00037)  
589 [00037](https://doi.org/10.1360/N972016-00037), 2016.

590 Trading Economics: Russia cement production, available at:  
591 <https://tradingeconomics.com/russia/cement-production>, 2021

592 Xi, F., Davis, S. J., Ciais, P., Crawford-Brown, D., Guan, D., Pade, C., Shi, T., Syddall,  
593 M., Lv, J., Ji, L., Bing, L., Wang, J., Wei, W., Yang, K.-H., Lagerblad, B., Galan,  
594 I., Andrade, C., Zhang, Y., and Liu, Z.: Substantial global carbon uptake by cement  
595 carbonation, *Nat. Geosci.*, 9, 880–883, <https://doi.org/10.1038/ngeo2840>, 2016.

596 Xu, J.-H., Fleiter, T., Eichhammer, W., and Fan, Y.: Energy consumption and CO<sub>2</sub>  
597 emissions in China’s cement industry: A perspective from LMDI decomposition  
598 analysis, *Energ. Policy*, 50, 821–832, <https://doi.org/10.1016/j.enpol.2012.08.038>,  
599 2012.

600 Xu, J.-H., Fleiter, T., Fan, Y., and Eichhammer, W.: CO<sub>2</sub> emissions reduction potential  
601 in China’s cement industry compared to IEA’s Cement Technology Roadmap up  
602 to 2050, *Appl. Energy*, 130, 592–602,  
603 <https://doi.org/10.1016/j.apenergy.2014.03.004>, 2014.

604 Xuan, D., Zhan, B., Poon, C. S., and Zheng, W.: Carbon dioxide sequestration of  
605 concrete slurry waste and its valorisation in construction products, *Constr. Build.*  
606 *Mater.*, 113, 664–672, <https://doi.org/10.1016/j.conbuildmat.2016.03.109>, 2016.

607 Yang, K.-H., Seo, E.-A., and Tae, S.-H.: Carbonation and CO<sub>2</sub> uptake of concrete,  
608 *Environ. Impact Assess. Rev.*, 46, 43–52,  
609 <https://doi.org/10.1016/j.eiar.2014.01.004>, 2014.

610 Yang, K.-H., Song, J.-K., and Song, K.-I.: Assessment of CO<sub>2</sub> reduction of alkali-  
611 activated concrete, *J. Clean Prod.*, 39, 265–272,  
612 <https://doi.org/10.1016/j.jclepro.2012.08.001>, 2013.

613 Yang, Y.H, Shi, Y., Sun, W.J., et al. Terrestrial carbon sinks in China and around the  
614 world and their contribution to carbon neutrality. *Science China Life Sciences*, 6  
615 (5): 861-895, 2022.
